# Supplementary material for: Huang-Lian-Jie-Du Decoction Ameliorates Acute Ulcerative Colitis in Mice via Regulating NF-κB and Nrf2 Signaling Pathways and Enhancing Intestinal Barrier Function
Source: Front Pharmacol. 2019 Nov 21;10:1354. doi: 10.3389/fphar.2019.01354 (PMC6900672; doi:10.3389/fphar.2019.01354)
Supplement: Supplementary file 2 [file DataSheet_1.xlsx]

## Sheet: Mixed standards
Time	Mau
0.00228333	0.00268221
0.00561667	0.00345707
0.00895	0.00435114
0.0122833	0.00536442
0.0156167	0.0063777
0.01895	0.00733137
0.0222833	0.00822544
0.0256167	0.00905991
0.02895	0.00971556
0.0322833	0.0103116
0.0356167	0.0107288
0.03895	0.0110865
0.0422833	0.0113845
0.0456167	0.0116229
0.04895	0.0119209
0.0522833	0.0122786
0.0556167	0.0126958
0.05895	0.0131726
0.0622833	0.0137091
0.0656167	0.0142455
0.06895	0.0149012
0.0722833	0.0155568
0.0756167	0.0162125
0.07895	0.0168681
0.0822833	0.0175834
0.0856167	0.0182986
0.08895	0.0190139
0.0922833	0.0197291
0.0956167	0.0204444
0.09895	0.0212193
0.102283	0.0219345
0.105617	0.0227094
0.10895	0.0234842
0.112283	0.0242591
0.115617	0.025034
0.11895	0.0257492
0.122283	0.0265241
0.125617	0.0271797
0.12895	0.0277758
0.132283	0.0282526
0.135617	0.0286102
0.13895	0.028789
0.142283	0.0289679
0.145617	0.0290275
0.14895	0.0290871
0.152283	0.0292063
0.155617	0.0293851
0.15895	0.0296831
0.162283	0.0301003
0.165617	0.0306368
0.16895	0.0312328
0.172283	0.0318885
0.175617	0.0325441
0.17895	0.0331402
0.182283	0.0337362
0.185617	0.0342131
0.18895	0.0346899
0.192283	0.0351071
0.195617	0.0355244
0.19895	0.0360012
0.202283	0.0365376
0.205617	0.0370741
0.20895	0.0376105
0.212283	0.038147
0.215617	0.0386238
0.21895	0.0391006
0.222283	0.0393987
0.225617	0.0396371
0.22895	0.0398159
0.232283	0.0399351
0.235617	0.0400543
0.23895	0.0401735
0.242283	0.0403523
0.245617	0.0405908
0.24895	0.0408888
0.252283	0.041306
0.255617	0.0417233
0.25895	0.0422001
0.262283	0.0427365
0.265617	0.043273
0.26895	0.0438094
0.272283	0.0443459
0.275617	0.0448823
0.27895	0.0453591
0.282283	0.045836
0.285617	0.0463128
0.28895	0.04673
0.292283	0.0472069
0.295617	0.0476241
0.29895	0.0481606
0.302283	0.0486374
0.305617	0.0491738
0.30895	0.0497103
0.312283	0.0501871
0.315617	0.0506639
0.31895	0.0510812
0.322283	0.0514388
0.325617	0.0517368
0.32895	0.0519753
0.332283	0.0521541
0.335617	0.0523925
0.33895	0.0526309
0.342283	0.0528693
0.345617	0.0532269
0.34895	0.0535846
0.352283	0.0540614
0.355617	0.0545382
0.35895	0.0550747
0.362283	0.0556707
0.365617	0.0563264
0.36895	0.056982
0.372283	0.0576377
0.375617	0.0582933
0.37895	0.0588894
0.382283	0.0594854
0.385617	0.0599623
0.38895	0.0603795
0.392283	0.0606775
0.395617	0.0609159
0.39895	0.0610352
0.402283	0.0611544
0.405617	0.061214
0.40895	0.0613332
0.412283	0.0613928
0.415617	0.061512
0.41895	0.0616312
0.422283	0.0617504
0.425617	0.0619292
0.42895	0.062108
0.432283	0.0622869
0.435617	0.0624061
0.43895	0.0625253
0.442283	0.0626445
0.445617	0.0627041
0.44895	0.0627041
0.452283	0.0627637
0.455617	0.0628233
0.45895	0.0628829
0.462283	0.0630021
0.465617	0.0631213
0.46895	0.0633597
0.472283	0.0636578
0.475617	0.064075
0.47895	0.0644922
0.482283	0.0649095
0.485617	0.0653863
0.48895	0.0658631
0.492283	0.06634
0.495617	0.0668168
0.49895	0.0672936
0.502283	0.0677705
0.505617	0.0681877
0.50895	0.0686049
0.512283	0.0689626
0.515617	0.0692606
0.51895	0.0695586
0.522283	0.0697374
0.525617	0.0699162
0.52895	0.0700355
0.532283	0.0700951
0.535617	0.0702143
0.53895	0.0702739
0.542283	0.0703931
0.545617	0.0704527
0.54895	0.0705123
0.552283	0.0706315
0.555617	0.0706911
0.55895	0.0707507
0.562283	0.0708103
0.565617	0.0708103
0.56895	0.0708103
0.572283	0.0708103
0.575617	0.0706911
0.57895	0.0705123
0.582283	0.0703335
0.585617	0.0700355
0.58895	0.0696182
0.592283	0.069201
0.595617	0.0687242
0.59895	0.0682473
0.602283	0.0678897
0.605617	0.0675917
0.60895	0.0674129
0.612283	0.0673532
0.615617	0.0673532
0.61895	0.0674129
0.622283	0.0675917
0.625617	0.0676513
0.62895	0.0677109
0.632283	0.0677109
0.635617	0.0675917
0.63895	0.0673532
0.642283	0.0671148
0.645617	0.0668168
0.64895	0.0665784
0.652283	0.0663996
0.655617	0.06634
0.65895	0.0663996
0.662283	0.0665784
0.665617	0.0667572
0.66895	0.0670552
0.672283	0.067234
0.675617	0.0674129
0.67895	0.0675321
0.682283	0.0675321
0.685617	0.0674725
0.68895	0.0673532
0.692283	0.067234
0.695617	0.0671148
0.69895	0.0670552
0.702283	0.0669956
0.705617	0.0670552
0.70895	0.0671148
0.712283	0.067234
0.715617	0.0674129
0.71895	0.0675321
0.722283	0.0677109
0.725617	0.0678897
0.72895	0.0680685
0.732283	0.0682473
0.735617	0.0683665
0.73895	0.0684261
0.742283	0.0684857
0.745617	0.0684857
0.74895	0.0683665
0.752283	0.0683069
0.755617	0.0681281
0.75895	0.0680089
0.762283	0.0678897
0.765617	0.0678301
0.76895	0.0677705
0.772283	0.0677705
0.775617	0.0677109
0.77895	0.0677109
0.782283	0.0676513
0.785617	0.0675321
0.78895	0.0673532
0.792283	0.0671744
0.795617	0.066936
0.79895	0.0667572
0.802283	0.0665188
0.805617	0.06634
0.80895	0.0662208
0.812283	0.0661016
0.815617	0.0659823
0.81895	0.0658631
0.822283	0.0658035
0.825617	0.0658035
0.82895	0.0658035
0.832283	0.0658631
0.835617	0.0660419
0.83895	0.0662208
0.842283	0.0665188
0.845617	0.0668168
0.84895	0.067234
0.852283	0.0675917
0.855617	0.0679493
0.85895	0.0682473
0.862283	0.0684857
0.865617	0.0686646
0.86895	0.0688434
0.872283	0.068903
0.875617	0.0689626
0.87895	0.0689626
0.882283	0.0690222
0.885617	0.0690222
0.88895	0.0690222
0.892283	0.0690222
0.895617	0.0690222
0.89895	0.0690222
0.902283	0.0690222
0.905617	0.0690818
0.90895	0.0691414
0.912283	0.0692606
0.915617	0.0693798
0.91895	0.0695586
0.922283	0.0697374
0.925617	0.0699759
0.92895	0.0701547
0.932283	0.0703931
0.935617	0.0705719
0.93895	0.0707507
0.942283	0.0708699
0.945617	0.0709891
0.94895	0.0710487
0.952283	0.0710487
0.955617	0.0710487
0.95895	0.0709891
0.962283	0.0708699
0.965617	0.0706911
0.96895	0.0705719
0.972283	0.0703335
0.975617	0.0701547
0.97895	0.0699759
0.982283	0.0698566
0.985617	0.0697374
0.98895	0.0696182
0.992283	0.0695586
0.995617	0.069499
0.99895	0.0694394
1.00228	0.0693202
1.00562	0.0692606
1.00895	0.0691414
1.01228	0.0690222
1.01562	0.0688434
1.01895	0.0686646
1.02228	0.0684857
1.02562	0.0683665
1.02895	0.0682473
1.03228	0.0681281
1.03562	0.0681281
1.03895	0.0681281
1.04228	0.0681281
1.04562	0.0681877
1.04895	0.0682473
1.05228	0.0683665
1.05562	0.0684261
1.05895	0.0685453
1.06228	0.0686646
1.06562	0.0687838
1.06895	0.068903
1.07228	0.0689626
1.07562	0.0690222
1.07895	0.0690818
1.08228	0.0689626
1.08562	0.0687838
1.08895	0.0684261
1.09228	0.0680089
1.09562	0.0674129
1.09895	0.0667572
1.10228	0.0659823
1.10562	0.0652671
1.10895	0.0644922
1.11228	0.0638962
1.11562	0.0633597
1.11895	0.0629425
1.12228	0.0627637
1.12562	0.0627041
1.12895	0.0628829
1.13228	0.0631809
1.13562	0.0635386
1.13895	0.0640154
1.14228	0.0645518
1.14562	0.0650287
1.14895	0.0654459
1.15228	0.0657439
1.15562	0.0659823
1.15895	0.0660419
1.16228	0.0660419
1.16562	0.0659823
1.16895	0.0658035
1.17228	0.0656843
1.17562	0.0655055
1.17895	0.0653863
1.18228	0.0653267
1.18562	0.0652671
1.18895	0.0653267
1.19228	0.0653863
1.19562	0.0655055
1.19895	0.0656843
1.20228	0.0658631
1.20562	0.0660419
1.20895	0.0662208
1.21228	0.0664592
1.21562	0.066638
1.21895	0.0668764
1.22228	0.0670552
1.22562	0.067234
1.22895	0.0674129
1.23228	0.0675917
1.23562	0.0677109
1.23895	0.0678301
1.24228	0.0678897
1.24562	0.0679493
1.24895	0.0678897
1.25228	0.0678301
1.25562	0.0677109
1.25895	0.0675917
1.26228	0.0674129
1.26562	0.0671744
1.26895	0.0669956
1.27228	0.0667572
1.27562	0.0665188
1.27895	0.0662208
1.28228	0.0659823
1.28562	0.0657439
1.28895	0.0655651
1.29228	0.0655055
1.29562	0.0654459
1.29895	0.0655055
1.30228	0.0656843
1.30562	0.0659227
1.30895	0.0662208
1.31228	0.0665188
1.31562	0.0668168
1.31895	0.0670552
1.32228	0.067234
1.32562	0.0672936
1.32895	0.067234
1.33228	0.0670552
1.33562	0.0668764
1.33895	0.0666976
1.34228	0.0664592
1.34562	0.0662804
1.34895	0.0661016
1.35228	0.0660419
1.35562	0.0659227
1.35895	0.0658631
1.36228	0.0658035
1.36562	0.0657439
1.36895	0.0656247
1.37228	0.0655055
1.37562	0.0653267
1.37895	0.0651479
1.38228	0.0650287
1.38562	0.0649095
1.38895	0.0648499
1.39228	0.0649095
1.39562	0.0649691
1.39895	0.0650883
1.40228	0.0652671
1.40562	0.0655055
1.40895	0.0657439
1.41228	0.0660419
1.41562	0.0662804
1.41895	0.0665188
1.42228	0.0666976
1.42562	0.0668168
1.42895	0.066936
1.43228	0.0670552
1.43562	0.0671148
1.43895	0.0671744
1.44228	0.067234
1.44562	0.0672936
1.44895	0.0674129
1.45228	0.0675917
1.45562	0.0677705
1.45895	0.0680089
1.46228	0.0681281
1.46562	0.0682473
1.46895	0.0683069
1.47228	0.0682473
1.47562	0.0681281
1.47895	0.0678301
1.48228	0.0675321
1.48562	0.0671148
1.48895	0.0666976
1.49228	0.0662804
1.49562	0.0659823
1.49895	0.0656843
1.50228	0.0654459
1.50562	0.0652671
1.50895	0.0651479
1.51228	0.0650883
1.51562	0.0650287
1.51895	0.0650287
1.52228	0.0650287
1.52562	0.0649691
1.52895	0.0649095
1.53228	0.0647902
1.53562	0.064671
1.53895	0.0645518
1.54228	0.0644326
1.54562	0.0643134
1.54895	0.0641942
1.55228	0.0641346
1.55562	0.0641346
1.55895	0.0641942
1.56228	0.0643134
1.56562	0.0644922
1.56895	0.064671
1.57228	0.0648499
1.57562	0.0649691
1.57895	0.0650883
1.58228	0.0650883
1.58562	0.0650883
1.58895	0.0650883
1.59228	0.0649691
1.59562	0.0649095
1.59895	0.0649095
1.60228	0.0649095
1.60562	0.0649095
1.60895	0.0649691
1.61228	0.0650287
1.61562	0.0650883
1.61895	0.0651479
1.62228	0.0652075
1.62562	0.0652671
1.62895	0.0653267
1.63228	0.0653863
1.63562	0.0654459
1.63895	0.0654459
1.64228	0.0655055
1.64562	0.0655055
1.64895	0.0654459
1.65228	0.0653267
1.65562	0.0651479
1.65895	0.0649095
1.66228	0.064671
1.66562	0.0644326
1.66895	0.0641942
1.67228	0.0639558
1.67562	0.063777
1.67895	0.0635982
1.68228	0.0634789
1.68562	0.0633597
1.68895	0.0632405
1.69228	0.0631213
1.69562	0.0630617
1.69895	0.0629425
1.70228	0.0628829
1.70562	0.0628233
1.70895	0.0628829
1.71228	0.0629425
1.71562	0.0630021
1.71895	0.0631809
1.72228	0.0633001
1.72562	0.0634789
1.72895	0.0636578
1.73228	0.0638366
1.73562	0.0639558
1.73895	0.0641942
1.74228	0.0644326
1.74562	0.064671
1.74895	0.0650287
1.75228	0.0653863
1.75562	0.0658035
1.75895	0.0662208
1.76228	0.0665784
1.76562	0.0668764
1.76895	0.0671148
1.77228	0.067234
1.77562	0.0671744
1.77895	0.0670552
1.78228	0.0667572
1.78562	0.0663996
1.78895	0.0659823
1.79228	0.0656247
1.79562	0.0652075
1.79895	0.0649095
1.80228	0.0647306
1.80562	0.0646114
1.80895	0.0645518
1.81228	0.0646114
1.81562	0.064671
1.81895	0.0647306
1.82228	0.0647902
1.82562	0.0648499
1.82895	0.0648499
1.83228	0.0647902
1.83562	0.064671
1.83895	0.0644922
1.84228	0.0643134
1.84562	0.064075
1.84895	0.0638366
1.85228	0.0635386
1.85562	0.0632405
1.85895	0.0629425
1.86228	0.0627041
1.86562	0.0624657
1.86895	0.0623465
1.87228	0.0622869
1.87562	0.0623465
1.87895	0.0625253
1.88228	0.0627637
1.88562	0.0631213
1.88895	0.0634789
1.89228	0.063777
1.89562	0.064075
1.89895	0.0642538
1.90228	0.064373
1.90562	0.064373
1.90895	0.0643134
1.91228	0.0641346
1.91562	0.0638962
1.91895	0.0636578
1.92228	0.0635386
1.92562	0.0634193
1.92895	0.0633597
1.93228	0.0634193
1.93562	0.0635386
1.93895	0.0637174
1.94228	0.0640154
1.94562	0.0643134
1.94895	0.0647306
1.95228	0.0650883
1.95562	0.0655651
1.95895	0.0659823
1.96228	0.0663996
1.96562	0.0668168
1.96895	0.0671744
1.97228	0.0674725
1.97562	0.0675917
1.97895	0.0675917
1.98228	0.0675321
1.98562	0.0672936
1.98895	0.0669956
1.99228	0.066638
1.99562	0.0662208
1.99895	0.0658631
2.00228	0.0655651
2.00562	0.0653863
2.00895	0.0652671
2.01228	0.0653267
2.01562	0.0654459
2.01895	0.0656843
2.02228	0.0659823
2.02562	0.0663996
2.02895	0.0668764
2.03228	0.0673532
2.03562	0.0678897
2.03895	0.0684261
2.04228	0.0690222
2.04562	0.0696778
2.04895	0.0702739
2.05228	0.0709295
2.05562	0.0715852
2.05895	0.0722408
2.06228	0.0729561
2.06562	0.0736117
2.06895	0.0742674
2.07228	0.0748634
2.07562	0.0755191
2.07895	0.0761151
2.08228	0.0768304
2.08562	0.0775456
2.08895	0.0783205
2.09228	0.0792146
2.09562	0.0801682
2.09895	0.0812411
2.10228	0.0824332
2.10562	0.0836849
2.10895	0.0850558
2.11228	0.0864267
2.11562	0.0877976
2.11895	0.0891685
2.12228	0.0905395
2.12562	0.0919104
2.12895	0.0933409
2.13228	0.094831
2.13562	0.0964403
2.13895	0.0981092
2.14228	0.100017
2.14562	0.102103
2.14895	0.104487
2.15228	0.107229
2.15562	0.110328
2.15895	0.113964
2.16228	0.118196
2.16562	0.123084
2.16895	0.128806
2.17228	0.135362
2.17562	0.142872
2.17895	0.151277
2.18228	0.160694
2.18562	0.170946
2.18895	0.181913
2.19228	0.193596
2.19562	0.205696
2.19895	0.218153
2.20228	0.23073
2.20562	0.243247
2.20895	0.255644
2.21228	0.267744
2.21562	0.279427
2.21895	0.290632
2.22228	0.301361
2.22562	0.311494
2.22895	0.321031
2.23228	0.329971
2.23562	0.338316
2.23895	0.346065
2.24228	0.353277
2.24562	0.360012
2.24895	0.366271
2.25228	0.372231
2.25562	0.377893
2.25895	0.383377
2.26228	0.38898
2.26562	0.394702
2.26895	0.400901
2.27228	0.407755
2.27562	0.415564
2.27895	0.424683
2.28228	0.435531
2.28562	0.448585
2.28895	0.464439
2.29228	0.483751
2.29562	0.507236
2.29895	0.535727
2.30228	0.569999
2.30562	0.610709
2.30895	0.658572
2.31228	0.713825
2.31562	0.776589
2.31895	0.846505
2.32228	0.922918
2.32562	1.00482
2.32895	1.09076
2.33228	1.17928
2.33562	1.26851
2.33895	1.35672
2.34228	1.44237
2.34562	1.52385
2.34895	1.60015
2.35228	1.6703
2.35562	1.73384
2.35895	1.79058
2.36228	1.84071
2.36562	1.88452
2.36895	1.92261
2.37228	1.95551
2.37562	1.984
2.37895	2.00874
2.38228	2.03025
2.38562	2.04909
2.38895	2.06566
2.39228	2.08026
2.39562	2.09308
2.39895	2.10428
2.40228	2.114
2.40562	2.12228
2.40895	2.12932
2.41228	2.13522
2.41562	2.14005
2.41895	2.1441
2.42228	2.14761
2.42562	2.15083
2.42895	2.15405
2.43228	2.15757
2.43562	2.16174
2.43895	2.16693
2.44228	2.17342
2.44562	2.18171
2.44895	2.19202
2.45228	2.2049
2.45562	2.22069
2.45895	2.23976
2.46228	2.26253
2.46562	2.28935
2.46895	2.32053
2.47228	2.35629
2.47562	2.39676
2.47895	2.44212
2.48228	2.49231
2.48562	2.54744
2.48895	2.60764
2.49228	2.67327
2.49562	2.74473
2.49895	2.82282
2.50228	2.90859
2.50562	3.00318
2.50895	3.10779
2.51228	3.22354
2.51562	3.35109
2.51895	3.49051
2.52228	3.64089
2.52562	3.80045
2.52895	3.96615
2.53228	4.13406
2.53562	4.29928
2.53895	4.4567
2.54228	4.60082
2.54562	4.72671
2.54895	4.83036
2.55228	4.9088
2.55562	4.96066
2.55895	4.98599
2.56228	4.98652
2.56562	4.96507
2.56895	4.92555
2.57228	4.87226
2.57562	4.80986
2.57895	4.74268
2.58228	4.67449
2.58562	4.60845
2.58895	4.5467
2.59228	4.49085
2.59562	4.44144
2.59895	4.39858
2.60228	4.36199
2.60562	4.33117
2.60895	4.30554
2.61228	4.28492
2.61562	4.26936
2.61895	4.25959
2.62228	4.25702
2.62562	4.26412
2.62895	4.2845
2.63228	4.3233
2.63562	4.38792
2.63895	4.48805
2.64228	4.63611
2.64562	4.84705
2.64895	5.13744
2.65228	5.52416
2.65562	6.02216
2.65895	6.6424
2.66228	7.38966
2.66562	8.26037
2.66895	9.2417
2.67228	10.3111
2.67562	11.4375
2.67895	12.5836
2.68228	13.7092
2.68562	14.7754
2.68895	15.7473
2.69228	16.5974
2.69562	17.307
2.69895	17.8665
2.70228	18.2747
2.70562	18.5376
2.70895	18.666
2.71228	18.6738
2.71562	18.5759
2.71895	18.3871
2.72228	18.1214
2.72562	17.7916
2.72895	17.4097
2.73228	16.9868
2.73562	16.5333
2.73895	16.0582
2.74228	15.5696
2.74562	15.0738
2.74895	14.5751
2.75228	14.0762
2.75562	13.5784
2.75895	13.0818
2.76228	12.5867
2.76562	12.0938
2.76895	11.6048
2.77228	11.1225
2.77562	10.6509
2.77895	10.1945
2.78228	9.75823
2.78562	9.34649
2.78895	8.96281
2.79228	8.60935
2.79562	8.28695
2.79895	7.99483
2.80228	7.73108
2.80562	7.49302
2.80895	7.27737
2.81228	7.08079
2.81562	6.89983
2.81895	6.73145
2.82228	6.57284
2.82562	6.42151
2.82895	6.27542
2.83228	6.1329
2.83562	5.99253
2.83895	5.85324
2.84228	5.71436
2.84562	5.57524
2.84895	5.43582
2.85228	5.29599
2.85562	5.15616
2.85895	5.01657
2.86228	4.87792
2.86562	4.74083
2.86895	4.60601
2.87228	4.47422
2.87562	4.34601
2.87895	4.22186
2.88228	4.10193
2.88562	3.98612
2.88895	3.87412
2.89228	3.76517
2.89562	3.65835
2.89895	3.55273
2.90228	3.44729
2.90562	3.34138
2.90895	3.23439
2.91228	3.12644
2.91562	3.0179
2.91895	2.90966
2.92228	2.80321
2.92562	2.69997
2.92895	2.60174
2.93228	2.51013
2.93562	2.42668
2.93895	2.35254
2.94228	2.2887
2.94562	2.23559
2.94895	2.19333
2.95228	2.16174
2.95562	2.1401
2.95895	2.12759
2.96228	2.123
2.96562	2.12502
2.96895	2.13212
2.97228	2.14273
2.97562	2.15524
2.97895	2.16806
2.98228	2.17986
2.98562	2.18946
2.98895	2.19601
2.99228	2.19887
2.99562	2.19786
2.99895	2.19297
3.00228	2.18451
3.00562	2.17289
3.00895	2.15864
3.01228	2.14249
3.01562	2.12502
3.01895	2.10679
3.02228	2.08831
3.02562	2.06995
3.02895	2.05201
3.03228	2.03472
3.03562	2.01827
3.03895	2.00272
3.04228	1.98817
3.04562	1.97464
3.04895	1.96218
3.05228	1.95086
3.05562	1.94055
3.05895	1.93131
3.06228	1.92308
3.06562	1.91575
3.06895	1.90926
3.07228	1.90347
3.07562	1.89829
3.07895	1.89358
3.08228	1.88917
3.08562	1.885
3.08895	1.88094
3.09228	1.87689
3.09562	1.87278
3.09895	1.86855
3.10228	1.86414
3.10562	1.85949
3.10895	1.85466
3.11228	1.84959
3.11562	1.84435
3.11895	1.83892
3.12228	1.8335
3.12562	1.82813
3.12895	1.82283
3.13228	1.81782
3.13562	1.81317
3.13895	1.80894
3.14228	1.80537
3.14562	1.80238
3.14895	1.80024
3.15228	1.79899
3.15562	1.79857
3.15895	1.79917
3.16228	1.80084
3.16562	1.80346
3.16895	1.80721
3.17228	1.81192
3.17562	1.81764
3.17895	1.82432
3.18228	1.83189
3.18562	1.84035
3.18895	1.84953
3.19228	1.85955
3.19562	1.87021
3.19895	1.88166
3.20228	1.89382
3.20562	1.90663
3.20895	1.92016
3.21228	1.93435
3.21562	1.94913
3.21895	1.96445
3.22228	1.98025
3.22562	1.9964
3.22895	2.01279
3.23228	2.02918
3.23562	2.04551
3.23895	2.06155
3.24228	2.0771
3.24562	2.092
3.24895	2.10607
3.25228	2.11912
3.25562	2.13093
3.25895	2.14142
3.26228	2.15036
3.26562	2.15775
3.26895	2.16335
3.27228	2.16722
3.27562	2.16931
3.27895	2.16949
3.28228	2.16776
3.28562	2.16424
3.28895	2.15882
3.29228	2.15155
3.29562	2.14261
3.29895	2.13188
3.30228	2.11954
3.30562	2.10559
3.30895	2.09022
3.31228	2.07359
3.31562	2.05576
3.31895	2.03699
3.32228	2.01744
3.32562	1.99741
3.32895	1.97709
3.33228	1.95676
3.33562	1.93673
3.33895	1.91712
3.34228	1.89811
3.34562	1.87993
3.34895	1.86265
3.35228	1.84637
3.35562	1.83105
3.35895	1.81687
3.36228	1.8037
3.36562	1.79166
3.36895	1.78063
3.37228	1.77073
3.37562	1.76185
3.37895	1.75399
3.38228	1.74719
3.38562	1.74135
3.38895	1.73646
3.39228	1.73253
3.39562	1.72943
3.39895	1.72716
3.40228	1.72573
3.40562	1.72502
3.40895	1.72496
3.41228	1.72555
3.41562	1.72675
3.41895	1.72842
3.42228	1.73056
3.42562	1.73306
3.42895	1.73604
3.43228	1.73932
3.43562	1.74296
3.43895	1.74689
3.44228	1.75107
3.44562	1.75542
3.44895	1.75995
3.45228	1.7646
3.45562	1.76924
3.45895	1.77383
3.46228	1.77836
3.46562	1.7826
3.46895	1.78671
3.47228	1.79046
3.47562	1.79398
3.47895	1.79714
3.48228	1.79994
3.48562	1.80238
3.48895	1.80435
3.49228	1.8059
3.49562	1.80691
3.49895	1.80751
3.50228	1.80763
3.50562	1.80733
3.50895	1.80656
3.51228	1.80542
3.51562	1.80399
3.51895	1.80227
3.52228	1.8003
3.52562	1.79809
3.52895	1.79565
3.53228	1.79309
3.53562	1.79034
3.53895	1.78748
3.54228	1.78462
3.54562	1.7817
3.54895	1.7789
3.55228	1.77634
3.55562	1.77401
3.55895	1.77211
3.56228	1.77062
3.56562	1.76972
3.56895	1.76936
3.57228	1.76966
3.57562	1.77062
3.57895	1.77222
3.58228	1.77455
3.58562	1.77765
3.58895	1.78152
3.59228	1.78623
3.59562	1.79178
3.59895	1.79821
3.60228	1.8056
3.60562	1.81395
3.60895	1.82331
3.61228	1.83356
3.61562	1.84476
3.61895	1.85692
3.62228	1.86998
3.62562	1.88386
3.62895	1.89859
3.63228	1.9142
3.63562	1.93059
3.63895	1.94788
3.64228	1.96606
3.64562	1.98507
3.64895	2.0051
3.65228	2.02602
3.65562	2.04808
3.65895	2.07126
3.66228	2.09564
3.66562	2.12133
3.66895	2.14839
3.67228	2.177
3.67562	2.20728
3.67895	2.23941
3.68228	2.27356
3.68562	2.30986
3.68895	2.34848
3.69228	2.38961
3.69562	2.43348
3.69895	2.48015
3.70228	2.52986
3.70562	2.58267
3.70895	2.63882
3.71228	2.69836
3.71562	2.76148
3.71895	2.82836
3.72228	2.89905
3.72562	2.97374
3.72895	3.05253
3.73228	3.13562
3.73562	3.223
3.73895	3.31479
3.74228	3.411
3.74562	3.51155
3.74895	3.61651
3.75228	3.72571
3.75562	3.83908
3.75895	3.9565
3.76228	4.07779
3.76562	4.20266
3.76895	4.33099
3.77228	4.46248
3.77562	4.59677
3.77895	4.7335
3.78228	4.87232
3.78562	5.01269
3.78895	5.15413
3.79228	5.29605
3.79562	5.43785
3.79895	5.57894
3.80228	5.71853
3.80562	5.85598
3.80895	5.99045
3.81228	6.12116
3.81562	6.2474
3.81895	6.3684
3.82228	6.48338
3.82562	6.59168
3.82895	6.69253
3.83228	6.78533
3.83562	6.86938
3.83895	6.94424
3.84228	7.00921
3.84562	7.06393
3.84895	7.10791
3.85228	7.14076
3.85562	7.16215
3.85895	7.17187
3.86228	7.1696
3.86562	7.15524
3.86895	7.12866
3.87228	7.08991
3.87562	7.03901
3.87895	6.97595
3.88228	6.90097
3.88562	6.81424
3.88895	6.71607
3.89228	6.60688
3.89562	6.48713
3.89895	6.35743
3.90228	6.21837
3.90562	6.07067
3.90895	5.91522
3.91228	5.7528
3.91562	5.58448
3.91895	5.41115
3.92228	5.23394
3.92562	5.05382
3.92895	4.87196
3.93228	4.68934
3.93562	4.50706
3.93895	4.32605
3.94228	4.14723
3.94562	3.97152
3.94895	3.79968
3.95228	3.63243
3.95562	3.47048
3.95895	3.31438
3.96228	3.16465
3.96562	3.02166
3.96895	2.8857
3.97228	2.75707
3.97562	2.63584
3.97895	2.52217
3.98228	2.41596
3.98562	2.31719
3.98895	2.22576
3.99228	2.14148
3.99562	2.06417
3.99895	1.99348
4.00228	1.92922
4.00562	1.87105
4.00895	1.81854
4.01228	1.77133
4.01562	1.72913
4.01895	1.69146
4.02228	1.65808
4.02562	1.62858
4.02895	1.60265
4.03228	1.58006
4.03562	1.56045
4.03895	1.54364
4.04228	1.52934
4.04562	1.51742
4.04895	1.50758
4.05228	1.49971
4.05562	1.49351
4.05895	1.48892
4.06228	1.48576
4.06562	1.48386
4.06895	1.48308
4.07228	1.48332
4.07562	1.48445
4.07895	1.48636
4.08228	1.48892
4.08562	1.49214
4.08895	1.49584
4.09228	1.49995
4.09562	1.50448
4.09895	1.50931
4.10228	1.51438
4.10562	1.51974
4.10895	1.52522
4.11228	1.53083
4.11562	1.53661
4.11895	1.54245
4.12228	1.54829
4.12562	1.55419
4.12895	1.56003
4.13228	1.56575
4.13562	1.57124
4.13895	1.57648
4.14228	1.58131
4.14562	1.58578
4.14895	1.58972
4.15228	1.59323
4.15562	1.59615
4.15895	1.59854
4.16228	1.60038
4.16562	1.6017
4.16895	1.60247
4.17228	1.60271
4.17562	1.60229
4.17895	1.60134
4.18228	1.59973
4.18562	1.59752
4.18895	1.59472
4.19228	1.59121
4.19562	1.58703
4.19895	1.58226
4.20228	1.57678
4.20562	1.57064
4.20895	1.56397
4.21228	1.55663
4.21562	1.54877
4.21895	1.54036
4.22228	1.53154
4.22562	1.5223
4.22895	1.51277
4.23228	1.50293
4.23562	1.49286
4.23895	1.48261
4.24228	1.47212
4.24562	1.46139
4.24895	1.45048
4.25228	1.43933
4.25562	1.42801
4.25895	1.41644
4.26228	1.4047
4.26562	1.3929
4.26895	1.3811
4.27228	1.36942
4.27562	1.35803
4.27895	1.34701
4.28228	1.33651
4.28562	1.32662
4.28895	1.3175
4.29228	1.30928
4.29562	1.30188
4.29895	1.29551
4.30228	1.29014
4.30562	1.28585
4.30895	1.28269
4.31228	1.28067
4.31562	1.27995
4.31895	1.28049
4.32228	1.28239
4.32562	1.28579
4.32895	1.29074
4.33228	1.2973
4.33562	1.3054
4.33895	1.31506
4.34228	1.3262
4.34562	1.33878
4.34895	1.35267
4.35228	1.36775
4.35562	1.38384
4.35895	1.40095
4.36228	1.41883
4.36562	1.43743
4.36895	1.45656
4.37228	1.47623
4.37562	1.49614
4.37895	1.51616
4.38228	1.53625
4.38562	1.55604
4.38895	1.57541
4.39228	1.59419
4.39562	1.61219
4.39895	1.62923
4.40228	1.64521
4.40562	1.65993
4.40895	1.67334
4.41228	1.68526
4.41562	1.69557
4.41895	1.70428
4.42228	1.71119
4.42562	1.71626
4.42895	1.71942
4.43228	1.72061
4.43562	1.71977
4.43895	1.71697
4.44228	1.71214
4.44562	1.70535
4.44895	1.69659
4.45228	1.68592
4.45562	1.67352
4.45895	1.65939
4.46228	1.64378
4.46562	1.62667
4.46895	1.60831
4.47228	1.5887
4.47562	1.56808
4.47895	1.5465
4.48228	1.52421
4.48562	1.50132
4.48895	1.47796
4.49228	1.45435
4.49562	1.43069
4.49895	1.40715
4.50228	1.3839
4.50562	1.36101
4.50895	1.33872
4.51228	1.31702
4.51562	1.2961
4.51895	1.27602
4.52228	1.25676
4.52562	1.23841
4.52895	1.22106
4.53228	1.20467
4.53562	1.18941
4.53895	1.17517
4.54228	1.16211
4.54562	1.15019
4.54895	1.13946
4.55228	1.12981
4.55562	1.12128
4.55895	1.11377
4.56228	1.10734
4.56562	1.10185
4.56895	1.0972
4.57228	1.09333
4.57562	1.09023
4.57895	1.08778
4.58228	1.086
4.58562	1.08469
4.58895	1.08397
4.59228	1.08367
4.59562	1.08391
4.59895	1.08457
4.60228	1.08564
4.60562	1.08713
4.60895	1.08898
4.61228	1.09106
4.61562	1.09345
4.61895	1.09601
4.62228	1.09863
4.62562	1.10132
4.62895	1.104
4.63228	1.10662
4.63562	1.10912
4.63895	1.11157
4.64228	1.11383
4.64562	1.1161
4.64895	1.11824
4.65228	1.12027
4.65562	1.1223
4.65895	1.1242
4.66228	1.12611
4.66562	1.12796
4.66895	1.12981
4.67228	1.13165
4.67562	1.13344
4.67895	1.13529
4.68228	1.1372
4.68562	1.13922
4.68895	1.14143
4.69228	1.14381
4.69562	1.14638
4.69895	1.14924
4.70228	1.1524
4.70562	1.15591
4.70895	1.15991
4.71228	1.16432
4.71562	1.16915
4.71895	1.17457
4.72228	1.18053
4.72562	1.18715
4.72895	1.19442
4.73228	1.2024
4.73562	1.21117
4.73895	1.2207
4.74228	1.23107
4.74562	1.2424
4.74895	1.25468
4.75228	1.26791
4.75562	1.28216
4.75895	1.29735
4.76228	1.31351
4.76562	1.33061
4.76895	1.34861
4.77228	1.36751
4.77562	1.38724
4.77895	1.40762
4.78228	1.42866
4.78562	1.4503
4.78895	1.47235
4.79228	1.49482
4.79562	1.51759
4.79895	1.54066
4.80228	1.56385
4.80562	1.58709
4.80895	1.61046
4.81228	1.63376
4.81562	1.65695
4.81895	1.67996
4.82228	1.70273
4.82562	1.72508
4.82895	1.74695
4.83228	1.76835
4.83562	1.78909
4.83895	1.80924
4.84228	1.82867
4.84562	1.84739
4.84895	1.86539
4.85228	1.88267
4.85562	1.89924
4.85895	1.91504
4.86228	1.93006
4.86562	1.94424
4.86895	1.95765
4.87228	1.97023
4.87562	1.98191
4.87895	1.99282
4.88228	2.00289
4.88562	2.01213
4.88895	2.02066
4.89228	2.02852
4.89562	2.03568
4.89895	2.04229
4.90228	2.04837
4.90562	2.05386
4.90895	2.0588
4.91228	2.06316
4.91562	2.06703
4.91895	2.07025
4.92228	2.07287
4.92562	2.0749
4.92895	2.07627
4.93228	2.07692
4.93562	2.07686
4.93895	2.07603
4.94228	2.07448
4.94562	2.07222
4.94895	2.06912
4.95228	2.06524
4.95562	2.06059
4.95895	2.05511
4.96228	2.04879
4.96562	2.04164
4.96895	2.03359
4.97228	2.02459
4.97562	2.01464
4.97895	2.00373
4.98228	1.99169
4.98562	1.97858
4.98895	1.96433
4.99228	1.94889
4.99562	1.93232
4.99895	1.91462
5.00228	1.89579
5.00562	1.87582
5.00895	1.8549
5.01228	1.83296
5.01562	1.81019
5.01895	1.78653
5.02228	1.76209
5.02562	1.73694
5.02895	1.71101
5.03228	1.68449
5.03562	1.65725
5.03895	1.62947
5.04228	1.6011
5.04562	1.57219
5.04895	1.54281
5.05228	1.513
5.05562	1.4829
5.05895	1.45257
5.06228	1.42199
5.06562	1.39135
5.06895	1.36071
5.07228	1.33008
5.07562	1.29968
5.07895	1.26952
5.08228	1.23978
5.08562	1.21045
5.08895	1.18172
5.09228	1.15365
5.09562	1.12641
5.09895	1.10006
5.10228	1.07473
5.10562	1.05047
5.10895	1.02741
5.11228	1.00547
5.11562	0.984848
5.11895	0.965536
5.12228	0.947595
5.12562	0.930965
5.12895	0.915706
5.13228	0.901818
5.13562	0.889301
5.13895	0.878155
5.14228	0.86832
5.14562	0.859857
5.14895	0.852644
5.15228	0.846744
5.15562	0.841975
5.15895	0.838339
5.16228	0.835657
5.16562	0.833988
5.16895	0.833094
5.17228	0.832975
5.17562	0.833511
5.17895	0.834644
5.18228	0.836253
5.18562	0.838339
5.18895	0.840783
5.19228	0.843585
5.19562	0.846624
5.19895	0.849843
5.20228	0.85324
5.20562	0.856757
5.20895	0.860214
5.21228	0.863612
5.21562	0.86695
5.21895	0.870168
5.22228	0.873208
5.22562	0.876069
5.22895	0.878692
5.23228	0.881016
5.23562	0.883102
5.23895	0.88495
5.24228	0.886559
5.24562	0.88799
5.24895	0.889182
5.25228	0.890195
5.25562	0.89103
5.25895	0.891745
5.26228	0.892401
5.26562	0.892937
5.26895	0.893295
5.27228	0.893593
5.27562	0.893772
5.27895	0.893831
5.28228	0.893712
5.28562	0.893533
5.28895	0.893176
5.29228	0.892818
5.29562	0.892401
5.29895	0.891984
5.30228	0.891626
5.30562	0.891387
5.30895	0.891268
5.31228	0.891387
5.31562	0.891685
5.31895	0.892162
5.32228	0.892878
5.32562	0.893772
5.32895	0.894845
5.33228	0.896215
5.33562	0.897706
5.33895	0.899494
5.34228	0.901461
5.34562	0.903785
5.34895	0.906348
5.35228	0.909328
5.35562	0.912607
5.35895	0.916243
5.36228	0.920296
5.36562	0.924766
5.36895	0.929713
5.37228	0.935078
5.37562	0.940919
5.37895	0.947297
5.38228	0.95427
5.38562	0.961781
5.38895	0.970006
5.39228	0.978827
5.39562	0.988364
5.39895	0.998557
5.40228	1.0094
5.40562	1.02085
5.40895	1.03289
5.41228	1.04553
5.41562	1.05864
5.41895	1.07223
5.42228	1.08635
5.42562	1.10096
5.42895	1.11604
5.43228	1.13153
5.43562	1.14745
5.43895	1.16366
5.44228	1.18017
5.44562	1.19686
5.44895	1.21367
5.45228	1.23042
5.45562	1.24711
5.45895	1.26362
5.46228	1.27977
5.46562	1.29563
5.46895	1.31094
5.47228	1.32573
5.47562	1.33985
5.47895	1.35326
5.48228	1.36584
5.48562	1.37752
5.48895	1.38819
5.49228	1.39785
5.49562	1.40637
5.49895	1.4137
5.50228	1.41984
5.50562	1.42479
5.50895	1.42843
5.51228	1.43075
5.51562	1.43182
5.51895	1.43164
5.52228	1.43015
5.52562	1.42741
5.52895	1.42336
5.53228	1.41805
5.53562	1.41156
5.53895	1.40381
5.54228	1.39493
5.54562	1.38491
5.54895	1.37383
5.55228	1.36179
5.55562	1.34885
5.55895	1.33508
5.56228	1.3206
5.56562	1.30546
5.56895	1.28984
5.57228	1.27375
5.57562	1.25724
5.57895	1.24049
5.58228	1.22344
5.58562	1.20634
5.58895	1.18905
5.59228	1.17177
5.59562	1.15448
5.59895	1.13732
5.60228	1.12021
5.60562	1.10328
5.60895	1.08653
5.61228	1.07008
5.61562	1.05399
5.61895	1.03819
5.62228	1.02288
5.62562	1.00809
5.62895	0.993788
5.63228	0.980079
5.63562	0.966966
5.63895	0.954449
5.64228	0.942588
5.64562	0.931263
5.64895	0.920594
5.65228	0.910401
5.65562	0.900745
5.65895	0.891566
5.66228	0.882864
5.66562	0.874639
5.66895	0.866771
5.67228	0.85938
5.67562	0.852406
5.67895	0.84579
5.68228	0.839591
5.68562	0.83375
5.68895	0.828266
5.69228	0.823081
5.69562	0.818193
5.69895	0.813603
5.70228	0.809312
5.70562	0.805259
5.70895	0.801504
5.71228	0.797927
5.71562	0.794649
5.71895	0.791669
5.72228	0.788987
5.72562	0.786543
5.72895	0.784457
5.73228	0.782609
5.73562	0.781059
5.73895	0.779808
5.74228	0.778794
5.74562	0.77796
5.74895	0.777364
5.75228	0.776887
5.75562	0.776649
5.75895	0.77647
5.76228	0.776529
5.76562	0.776768
5.76895	0.777245
5.77228	0.778139
5.77562	0.77939
5.77895	0.781119
5.78228	0.783384
5.78562	0.786245
5.78895	0.789642
5.79228	0.793755
5.79562	0.798523
5.79895	0.804007
5.80228	0.810206
5.80562	0.81718
5.80895	0.824928
5.81228	0.833571
5.81562	0.843167
5.81895	0.853717
5.82228	0.86534
5.82562	0.878036
5.82895	0.891864
5.83228	0.906825
5.83562	0.922978
5.83895	0.940263
5.84228	0.9588
5.84562	0.97847
5.84895	0.999272
5.85228	1.02121
5.85562	1.04421
5.85895	1.06817
5.86228	1.09303
5.86562	1.11872
5.86895	1.14512
5.87228	1.17213
5.87562	1.1996
5.87895	1.22744
5.88228	1.25557
5.88562	1.28388
5.88895	1.31226
5.89228	1.34057
5.89562	1.3687
5.89895	1.39648
5.90228	1.42384
5.90562	1.45054
5.90895	1.47635
5.91228	1.50126
5.91562	1.52498
5.91895	1.5474
5.92228	1.5685
5.92562	1.58811
5.92895	1.60617
5.93228	1.62262
5.93562	1.6374
5.93895	1.65045
5.94228	1.66172
5.94562	1.67131
5.94895	1.67906
5.95228	1.68502
5.95562	1.6892
5.95895	1.69164
5.96228	1.6923
5.96562	1.69122
5.96895	1.68848
5.97228	1.68413
5.97562	1.67817
5.97895	1.67078
5.98228	1.66196
5.98562	1.65182
5.98895	1.64056
5.99228	1.62816
5.99562	1.61481
5.99895	1.60068
6.00228	1.58584
6.00562	1.57046
6.00895	1.55467
6.01228	1.53857
6.01562	1.5223
6.01895	1.50615
6.02228	1.49012
6.02562	1.47444
6.02895	1.4593
6.03228	1.44488
6.03562	1.43135
6.03895	1.41883
6.04228	1.40762
6.04562	1.39773
6.04895	1.38938
6.05228	1.38259
6.05562	1.37752
6.05895	1.37424
6.06228	1.37275
6.06562	1.37317
6.06895	1.37556
6.07228	1.37997
6.07562	1.38646
6.07895	1.39505
6.08228	1.40589
6.08562	1.41901
6.08895	1.43439
6.09228	1.45209
6.09562	1.47212
6.09895	1.49435
6.10228	1.51867
6.10562	1.54507
6.10895	1.57326
6.11228	1.60313
6.11562	1.63442
6.11895	1.66678
6.12228	1.70004
6.12562	1.73396
6.12895	1.76811
6.13228	1.80227
6.13562	1.83618
6.13895	1.86956
6.14228	1.90204
6.14562	1.93346
6.14895	1.9635
6.15228	1.99193
6.15562	2.01851
6.15895	2.04307
6.16228	2.06536
6.16562	2.08533
6.16895	2.10273
6.17228	2.11757
6.17562	2.12961
6.17895	2.13879
6.18228	2.14511
6.18562	2.14851
6.18895	2.14887
6.19228	2.14624
6.19562	2.14064
6.19895	2.13218
6.20228	2.12091
6.20562	2.10702
6.20895	2.09063
6.21228	2.07204
6.21562	2.05135
6.21895	2.02894
6.22228	2.00498
6.22562	1.97965
6.22895	1.9533
6.23228	1.92612
6.23562	1.89829
6.23895	1.8701
6.24228	1.84178
6.24562	1.81359
6.24895	1.78581
6.25228	1.75869
6.25562	1.73247
6.25895	1.70738
6.26228	1.68371
6.26562	1.6616
6.26895	1.64139
6.27228	1.62315
6.27562	1.60712
6.27895	1.59341
6.28228	1.58209
6.28562	1.5732
6.28895	1.56689
6.29228	1.56313
6.29562	1.56182
6.29895	1.56295
6.30228	1.56653
6.30562	1.57231
6.30895	1.58024
6.31228	1.59007
6.31562	1.60176
6.31895	1.61505
6.32228	1.62971
6.32562	1.64562
6.32895	1.66243
6.33228	1.67996
6.33562	1.69796
6.33895	1.71614
6.34228	1.7342
6.34562	1.7519
6.34895	1.76901
6.35228	1.78516
6.35562	1.80018
6.35895	1.81383
6.36228	1.82593
6.36562	1.83624
6.36895	1.84476
6.37228	1.8512
6.37562	1.85561
6.37895	1.85788
6.38228	1.85794
6.38562	1.85573
6.38895	1.85132
6.39228	1.84464
6.39562	1.83576
6.39895	1.82474
6.40228	1.81156
6.40562	1.79636
6.40895	1.77926
6.41228	1.76036
6.41562	1.7398
6.41895	1.71763
6.42228	1.69408
6.42562	1.66923
6.42895	1.64324
6.43228	1.6163
6.43562	1.58852
6.43895	1.56015
6.44228	1.53136
6.44562	1.50234
6.44895	1.47319
6.45228	1.44422
6.45562	1.41549
6.45895	1.38718
6.46228	1.35934
6.46562	1.33216
6.46895	1.30558
6.47228	1.27965
6.47562	1.2545
6.47895	1.23006
6.48228	1.2064
6.48562	1.18357
6.48895	1.16152
6.49228	1.1403
6.49562	1.11997
6.49895	1.1006
6.50228	1.08218
6.50562	1.06472
6.50895	1.04827
6.51228	1.03271
6.51562	1.01799
6.51895	1.00416
6.52228	0.991106
6.52562	0.978768
6.52895	0.967026
6.53228	0.95582
6.53562	0.945151
6.53895	0.934958
6.54228	0.925124
6.54562	0.915706
6.54895	0.906646
6.55228	0.897944
6.55562	0.889659
6.55895	0.881672
6.56228	0.874043
6.56562	0.866771
6.56895	0.859857
6.57228	0.85324
6.57562	0.846922
6.57895	0.840902
6.58228	0.835061
6.58562	0.829399
6.58895	0.823915
6.59228	0.818491
6.59562	0.813127
6.59895	0.807881
6.60228	0.802696
6.60562	0.797629
6.60895	0.792742
6.61228	0.787973
6.61562	0.783384
6.61895	0.778973
6.62228	0.774682
6.62562	0.77045
6.62895	0.766337
6.63228	0.762284
6.63562	0.758231
6.63895	0.754178
6.64228	0.750244
6.64562	0.74631
6.64895	0.742555
6.65228	0.738859
6.65562	0.735402
6.65895	0.732124
6.66228	0.729084
[truncated: 18,121 more rows]

## Sheet: HLJDD
Time	Mau
0.00228333	0.00268221
0.00561667	0.00345707
0.00895	0.00435114
0.0122833	0.00536442
0.0156167	0.0063777
0.01895	0.00733137
0.0222833	0.00822544
0.0256167	0.00905991
0.02895	0.00971556
0.0322833	0.0103116
0.0356167	0.0107288
0.03895	0.0110865
0.0422833	0.0113845
0.0456167	0.0116229
0.04895	0.0119209
0.0522833	0.0122786
0.0556167	0.0126958
0.05895	0.0131726
0.0622833	0.0137091
0.0656167	0.0142455
0.06895	0.0149012
0.0722833	0.0155568
0.0756167	0.0162125
0.07895	0.0168681
0.0822833	0.0175834
0.0856167	0.0182986
0.08895	0.0190139
0.0922833	0.0197291
0.0956167	0.0204444
0.09895	0.0212193
0.102283	0.0219345
0.105617	0.0227094
0.10895	0.0234842
0.112283	0.0242591
0.115617	0.025034
0.11895	0.0257492
0.122283	0.0265241
0.125617	0.0271797
0.12895	0.0277758
0.132283	0.0282526
0.135617	0.0286102
0.13895	0.028789
0.142283	0.0289679
0.145617	0.0290275
0.14895	0.0290871
0.152283	0.0292063
0.155617	0.0293851
0.15895	0.0296831
0.162283	0.0301003
0.165617	0.0306368
0.16895	0.0312328
0.172283	0.0318885
0.175617	0.0325441
0.17895	0.0331402
0.182283	0.0337362
0.185617	0.0342131
0.18895	0.0346899
0.192283	0.0351071
0.195617	0.0355244
0.19895	0.0360012
0.202283	0.0365376
0.205617	0.0370741
0.20895	0.0376105
0.212283	0.038147
0.215617	0.0386238
0.21895	0.0391006
0.222283	0.0393987
0.225617	0.0396371
0.22895	0.0398159
0.232283	0.0399351
0.235617	0.0400543
0.23895	0.0401735
0.242283	0.0403523
0.245617	0.0405908
0.24895	0.0408888
0.252283	0.041306
0.255617	0.0417233
0.25895	0.0422001
0.262283	0.0427365
0.265617	0.043273
0.26895	0.0438094
0.272283	0.0443459
0.275617	0.0448823
0.27895	0.0453591
0.282283	0.045836
0.285617	0.0463128
0.28895	0.04673
0.292283	0.0472069
0.295617	0.0476241
0.29895	0.0481606
0.302283	0.0486374
0.305617	0.0491738
0.30895	0.0497103
0.312283	0.0501871
0.315617	0.0506639
0.31895	0.0510812
0.322283	0.0514388
0.325617	0.0517368
0.32895	0.0519753
0.332283	0.0521541
0.335617	0.0523925
0.33895	0.0526309
0.342283	0.0528693
0.345617	0.0532269
0.34895	0.0535846
0.352283	0.0540614
0.355617	0.0545382
0.35895	0.0550747
0.362283	0.0556707
0.365617	0.0563264
0.36895	0.056982
0.372283	0.0576377
0.375617	0.0582933
0.37895	0.0588894
0.382283	0.0594854
0.385617	0.0599623
0.38895	0.0603795
0.392283	0.0606775
0.395617	0.0609159
0.39895	0.0610352
0.402283	0.0611544
0.405617	0.061214
0.40895	0.0613332
0.412283	0.0613928
0.415617	0.061512
0.41895	0.0616312
0.422283	0.0617504
0.425617	0.0619292
0.42895	0.062108
0.432283	0.0622869
0.435617	0.0624061
0.43895	0.0625253
0.442283	0.0626445
0.445617	0.0627041
0.44895	0.0627041
0.452283	0.0627637
0.455617	0.0628233
0.45895	0.0628829
0.462283	0.0630021
0.465617	0.0631213
0.46895	0.0633597
0.472283	0.0636578
0.475617	0.064075
0.47895	0.0644922
0.482283	0.0649095
0.485617	0.0653863
0.48895	0.0658631
0.492283	0.06634
0.495617	0.0668168
0.49895	0.0672936
0.502283	0.0677705
0.505617	0.0681877
0.50895	0.0686049
0.512283	0.0689626
0.515617	0.0692606
0.51895	0.0695586
0.522283	0.0697374
0.525617	0.0699162
0.52895	0.0700355
0.532283	0.0700951
0.535617	0.0702143
0.53895	0.0702739
0.542283	0.0703931
0.545617	0.0704527
0.54895	0.0705123
0.552283	0.0706315
0.555617	0.0706911
0.55895	0.0707507
0.562283	0.0708103
0.565617	0.0708103
0.56895	0.0708103
0.572283	0.0708103
0.575617	0.0706911
0.57895	0.0705123
0.582283	0.0703335
0.585617	0.0700355
0.58895	0.0696182
0.592283	0.069201
0.595617	0.0687242
0.59895	0.0682473
0.602283	0.0678897
0.605617	0.0675917
0.60895	0.0674129
0.612283	0.0673532
0.615617	0.0673532
0.61895	0.0674129
0.622283	0.0675917
0.625617	0.0676513
0.62895	0.0677109
0.632283	0.0677109
0.635617	0.0675917
0.63895	0.0673532
0.642283	0.0671148
0.645617	0.0668168
0.64895	0.0665784
0.652283	0.0663996
0.655617	0.06634
0.65895	0.0663996
0.662283	0.0665784
0.665617	0.0667572
0.66895	0.0670552
0.672283	0.067234
0.675617	0.0674129
0.67895	0.0675321
0.682283	0.0675321
0.685617	0.0674725
0.68895	0.0673532
0.692283	0.067234
0.695617	0.0671148
0.69895	0.0670552
0.702283	0.0669956
0.705617	0.0670552
0.70895	0.0671148
0.712283	0.067234
0.715617	0.0674129
0.71895	0.0675321
0.722283	0.0677109
0.725617	0.0678897
0.72895	0.0680685
0.732283	0.0682473
0.735617	0.0683665
0.73895	0.0684261
0.742283	0.0684857
0.745617	0.0684857
0.74895	0.0683665
0.752283	0.0683069
0.755617	0.0681281
0.75895	0.0680089
0.762283	0.0678897
0.765617	0.0678301
0.76895	0.0677705
0.772283	0.0677705
0.775617	0.0677109
0.77895	0.0677109
0.782283	0.0676513
0.785617	0.0675321
0.78895	0.0673532
0.792283	0.0671744
0.795617	0.066936
0.79895	0.0667572
0.802283	0.0665188
0.805617	0.06634
0.80895	0.0662208
0.812283	0.0661016
0.815617	0.0659823
0.81895	0.0658631
0.822283	0.0658035
0.825617	0.0658035
0.82895	0.0658035
0.832283	0.0658631
0.835617	0.0660419
0.83895	0.0662208
0.842283	0.0665188
0.845617	0.0668168
0.84895	0.067234
0.852283	0.0675917
0.855617	0.0679493
0.85895	0.0682473
0.862283	0.0684857
0.865617	0.0686646
0.86895	0.0688434
0.872283	0.068903
0.875617	0.0689626
0.87895	0.0689626
0.882283	0.0690222
0.885617	0.0690222
0.88895	0.0690222
0.892283	0.0690222
0.895617	0.0690222
0.89895	0.0690222
0.902283	0.0690222
0.905617	0.0690818
0.90895	0.0691414
0.912283	0.0692606
0.915617	0.0693798
0.91895	0.0695586
0.922283	0.0697374
0.925617	0.0699759
0.92895	0.0701547
0.932283	0.0703931
0.935617	0.0705719
0.93895	0.0707507
0.942283	0.0708699
0.945617	0.0709891
0.94895	0.0710487
0.952283	0.0710487
0.955617	0.0710487
0.95895	0.0709891
0.962283	0.0708699
0.965617	0.0706911
0.96895	0.0705719
0.972283	0.0703335
0.975617	0.0701547
0.97895	0.0699759
0.982283	0.0698566
0.985617	0.0697374
0.98895	0.0696182
0.992283	0.0695586
0.995617	0.069499
0.99895	0.0694394
1.00228	0.0693202
1.00562	0.0692606
1.00895	0.0691414
1.01228	0.0690222
1.01562	0.0688434
1.01895	0.0686646
1.02228	0.0684857
1.02562	0.0683665
1.02895	0.0682473
1.03228	0.0681281
1.03562	0.0681281
1.03895	0.0681281
1.04228	0.0681281
1.04562	0.0681877
1.04895	0.0682473
1.05228	0.0683665
1.05562	0.0684261
1.05895	0.0685453
1.06228	0.0686646
1.06562	0.0687838
1.06895	0.068903
1.07228	0.0689626
1.07562	0.0690222
1.07895	0.0690818
1.08228	0.0689626
1.08562	0.0687838
1.08895	0.0684261
1.09228	0.0680089
1.09562	0.0674129
1.09895	0.0667572
1.10228	0.0659823
1.10562	0.0652671
1.10895	0.0644922
1.11228	0.0638962
1.11562	0.0633597
1.11895	0.0629425
1.12228	0.0627637
1.12562	0.0627041
1.12895	0.0628829
1.13228	0.0631809
1.13562	0.0635386
1.13895	0.0640154
1.14228	0.0645518
1.14562	0.0650287
1.14895	0.0654459
1.15228	0.0657439
1.15562	0.0659823
1.15895	0.0660419
1.16228	0.0660419
1.16562	0.0659823
1.16895	0.0658035
1.17228	0.0656843
1.17562	0.0655055
1.17895	0.0653863
1.18228	0.0653267
1.18562	0.0652671
1.18895	0.0653267
1.19228	0.0653863
1.19562	0.0655055
1.19895	0.0656843
1.20228	0.0658631
1.20562	0.0660419
1.20895	0.0662208
1.21228	0.0664592
1.21562	0.066638
1.21895	0.0668764
1.22228	0.0670552
1.22562	0.067234
1.22895	0.0674129
1.23228	0.0675917
1.23562	0.0677109
1.23895	0.0678301
1.24228	0.0678897
1.24562	0.0679493
1.24895	0.0678897
1.25228	0.0678301
1.25562	0.0677109
1.25895	0.0675917
1.26228	0.0674129
1.26562	0.0671744
1.26895	0.0669956
1.27228	0.0667572
1.27562	0.0665188
1.27895	0.0662208
1.28228	0.0659823
1.28562	0.0657439
1.28895	0.0655651
1.29228	0.0655055
1.29562	0.0654459
1.29895	0.0655055
1.30228	0.0656843
1.30562	0.0659227
1.30895	0.0662208
1.31228	0.0665188
1.31562	0.0668168
1.31895	0.0670552
1.32228	0.067234
1.32562	0.0672936
1.32895	0.067234
1.33228	0.0670552
1.33562	0.0668764
1.33895	0.0666976
1.34228	0.0664592
1.34562	0.0662804
1.34895	0.0661016
1.35228	0.0660419
1.35562	0.0659227
1.35895	0.0658631
1.36228	0.0658035
1.36562	0.0657439
1.36895	0.0656247
1.37228	0.0655055
1.37562	0.0653267
1.37895	0.0651479
1.38228	0.0650287
1.38562	0.0649095
1.38895	0.0648499
1.39228	0.0649095
1.39562	0.0649691
1.39895	0.0650883
1.40228	0.0652671
1.40562	0.0655055
1.40895	0.0657439
1.41228	0.0660419
1.41562	0.0662804
1.41895	0.0665188
1.42228	0.0666976
1.42562	0.0668168
1.42895	0.066936
1.43228	0.0670552
1.43562	0.0671148
1.43895	0.0671744
1.44228	0.067234
1.44562	0.0672936
1.44895	0.0674129
1.45228	0.0675917
1.45562	0.0677705
1.45895	0.0680089
1.46228	0.0681281
1.46562	0.0682473
1.46895	0.0683069
1.47228	0.0682473
1.47562	0.0681281
1.47895	0.0678301
1.48228	0.0675321
1.48562	0.0671148
1.48895	0.0666976
1.49228	0.0662804
1.49562	0.0659823
1.49895	0.0656843
1.50228	0.0654459
1.50562	0.0652671
1.50895	0.0651479
1.51228	0.0650883
1.51562	0.0650287
1.51895	0.0650287
1.52228	0.0650287
1.52562	0.0649691
1.52895	0.0649095
1.53228	0.0647902
1.53562	0.064671
1.53895	0.0645518
1.54228	0.0644326
1.54562	0.0643134
1.54895	0.0641942
1.55228	0.0641346
1.55562	0.0641346
1.55895	0.0641942
1.56228	0.0643134
1.56562	0.0644922
1.56895	0.064671
1.57228	0.0648499
1.57562	0.0649691
1.57895	0.0650883
1.58228	0.0650883
1.58562	0.0650883
1.58895	0.0650883
1.59228	0.0649691
1.59562	0.0649095
1.59895	0.0649095
1.60228	0.0649095
1.60562	0.0649095
1.60895	0.0649691
1.61228	0.0650287
1.61562	0.0650883
1.61895	0.0651479
1.62228	0.0652075
1.62562	0.0652671
1.62895	0.0653267
1.63228	0.0653863
1.63562	0.0654459
1.63895	0.0654459
1.64228	0.0655055
1.64562	0.0655055
1.64895	0.0654459
1.65228	0.0653267
1.65562	0.0651479
1.65895	0.0649095
1.66228	0.064671
1.66562	0.0644326
1.66895	0.0641942
1.67228	0.0639558
1.67562	0.063777
1.67895	0.0635982
1.68228	0.0634789
1.68562	0.0633597
1.68895	0.0632405
1.69228	0.0631213
1.69562	0.0630617
1.69895	0.0629425
1.70228	0.0628829
1.70562	0.0628233
1.70895	0.0628829
1.71228	0.0629425
1.71562	0.0630021
1.71895	0.0631809
1.72228	0.0633001
1.72562	0.0634789
1.72895	0.0636578
1.73228	0.0638366
1.73562	0.0639558
1.73895	0.0641942
1.74228	0.0644326
1.74562	0.064671
1.74895	0.0650287
1.75228	0.0653863
1.75562	0.0658035
1.75895	0.0662208
1.76228	0.0665784
1.76562	0.0668764
1.76895	0.0671148
1.77228	0.067234
1.77562	0.0671744
1.77895	0.0670552
1.78228	0.0667572
1.78562	0.0663996
1.78895	0.0659823
1.79228	0.0656247
1.79562	0.0652075
1.79895	0.0649095
1.80228	0.0647306
1.80562	0.0646114
1.80895	0.0645518
1.81228	0.0646114
1.81562	0.064671
1.81895	0.0647306
1.82228	0.0647902
1.82562	0.0648499
1.82895	0.0648499
1.83228	0.0647902
1.83562	0.064671
1.83895	0.0644922
1.84228	0.0643134
1.84562	0.064075
1.84895	0.0638366
1.85228	0.0635386
1.85562	0.0632405
1.85895	0.0629425
1.86228	0.0627041
1.86562	0.0624657
1.86895	0.0623465
1.87228	0.0622869
1.87562	0.0623465
1.87895	0.0625253
1.88228	0.0627637
1.88562	0.0631213
1.88895	0.0634789
1.89228	0.063777
1.89562	0.064075
1.89895	0.0642538
1.90228	0.064373
1.90562	0.064373
1.90895	0.0643134
1.91228	0.0641346
1.91562	0.0638962
1.91895	0.0636578
1.92228	0.0635386
1.92562	0.0634193
1.92895	0.0633597
1.93228	0.0634193
1.93562	0.0635386
1.93895	0.0637174
1.94228	0.0640154
1.94562	0.0643134
1.94895	0.0647306
1.95228	0.0650883
1.95562	0.0655651
1.95895	0.0659823
1.96228	0.0663996
1.96562	0.0668168
1.96895	0.0671744
1.97228	0.0674725
1.97562	0.0675917
1.97895	0.0675917
1.98228	0.0675321
1.98562	0.0672936
1.98895	0.0669956
1.99228	0.066638
1.99562	0.0662208
1.99895	0.0658631
2.00228	0.0655651
2.00562	0.0653863
2.00895	0.0652671
2.01228	0.0653267
2.01562	0.0654459
2.01895	0.0656843
2.02228	0.0659823
2.02562	0.0663996
2.02895	0.0668764
2.03228	0.0673532
2.03562	0.0678897
2.03895	0.0684261
2.04228	0.0690222
2.04562	0.0696778
2.04895	0.0702739
2.05228	0.0709295
2.05562	0.0715852
2.05895	0.0722408
2.06228	0.0729561
2.06562	0.0736117
2.06895	0.0742674
2.07228	0.0748634
2.07562	0.0755191
2.07895	0.0761151
2.08228	0.0768304
2.08562	0.0775456
2.08895	0.0783205
2.09228	0.0792146
2.09562	0.0801682
2.09895	0.0812411
2.10228	0.0824332
2.10562	0.0836849
2.10895	0.0850558
2.11228	0.0864267
2.11562	0.0877976
2.11895	0.0891685
2.12228	0.0905395
2.12562	0.0919104
2.12895	0.0933409
2.13228	0.094831
2.13562	0.0964403
2.13895	0.0981092
2.14228	0.100017
2.14562	0.102103
2.14895	0.104487
2.15228	0.107229
2.15562	0.110328
2.15895	0.113964
2.16228	0.118196
2.16562	0.123084
2.16895	0.128806
2.17228	0.135362
2.17562	0.142872
2.17895	0.151277
2.18228	0.160694
2.18562	0.170946
2.18895	0.181913
2.19228	0.193596
2.19562	0.205696
2.19895	0.218153
2.20228	0.23073
2.20562	0.243247
2.20895	0.255644
2.21228	0.267744
2.21562	0.279427
2.21895	0.290632
2.22228	0.301361
2.22562	0.311494
2.22895	0.321031
2.23228	0.329971
2.23562	0.338316
2.23895	0.346065
2.24228	0.353277
2.24562	0.360012
2.24895	0.366271
2.25228	0.372231
2.25562	0.377893
2.25895	0.383377
2.26228	0.38898
2.26562	0.394702
2.26895	0.400901
2.27228	0.407755
2.27562	0.415564
2.27895	0.424683
2.28228	0.435531
2.28562	0.448585
2.28895	0.464439
2.29228	0.483751
2.29562	0.507236
2.29895	0.535727
2.30228	0.569999
2.30562	0.610709
2.30895	0.658572
2.31228	0.713825
2.31562	0.776589
2.31895	0.846505
2.32228	0.922918
2.32562	1.00482
2.32895	1.09076
2.33228	1.17928
2.33562	1.26851
2.33895	1.35672
2.34228	1.44237
2.34562	1.52385
2.34895	1.60015
2.35228	1.6703
2.35562	1.73384
2.35895	1.79058
2.36228	1.84071
2.36562	1.88452
2.36895	1.92261
2.37228	1.95551
2.37562	1.984
2.37895	2.00874
2.38228	2.03025
2.38562	2.04909
2.38895	2.06566
2.39228	2.08026
2.39562	2.09308
2.39895	2.10428
2.40228	2.114
2.40562	2.12228
2.40895	2.12932
2.41228	2.13522
2.41562	2.14005
2.41895	2.1441
2.42228	2.14761
2.42562	2.15083
2.42895	2.15405
2.43228	2.15757
2.43562	2.16174
2.43895	2.16693
2.44228	2.17342
2.44562	2.18171
2.44895	2.19202
2.45228	2.2049
2.45562	2.22069
2.45895	2.23976
2.46228	2.26253
2.46562	2.28935
2.46895	2.32053
2.47228	2.35629
2.47562	2.39676
2.47895	2.44212
2.48228	2.49231
2.48562	2.54744
2.48895	2.60764
2.49228	2.67327
2.49562	2.74473
2.49895	2.82282
2.50228	2.90859
2.50562	3.00318
2.50895	3.10779
2.51228	3.22354
2.51562	3.35109
2.51895	3.49051
2.52228	3.64089
2.52562	3.80045
2.52895	3.96615
2.53228	4.13406
2.53562	4.29928
2.53895	4.4567
2.54228	4.60082
2.54562	4.72671
2.54895	4.83036
2.55228	4.9088
2.55562	4.96066
2.55895	4.98599
2.56228	4.98652
2.56562	4.96507
2.56895	4.92555
2.57228	4.87226
2.57562	4.80986
2.57895	4.74268
2.58228	4.67449
2.58562	4.60845
2.58895	4.5467
2.59228	4.49085
2.59562	4.44144
2.59895	4.39858
2.60228	4.36199
2.60562	4.33117
2.60895	4.30554
2.61228	4.28492
2.61562	4.26936
2.61895	4.25959
2.62228	4.25702
2.62562	4.26412
2.62895	4.2845
2.63228	4.3233
2.63562	4.38792
2.63895	4.48805
2.64228	4.63611
2.64562	4.84705
2.64895	5.13744
2.65228	5.52416
2.65562	6.02216
2.65895	6.6424
2.66228	7.38966
2.66562	8.26037
2.66895	9.2417
2.67228	10.3111
2.67562	11.4375
2.67895	12.5836
2.68228	13.7092
2.68562	14.7754
2.68895	15.7473
2.69228	16.5974
2.69562	17.307
2.69895	17.8665
2.70228	18.2747
2.70562	18.5376
2.70895	18.666
2.71228	18.6738
2.71562	18.5759
2.71895	18.3871
2.72228	18.1214
2.72562	17.7916
2.72895	17.4097
2.73228	16.9868
2.73562	16.5333
2.73895	16.0582
2.74228	15.5696
2.74562	15.0738
2.74895	14.5751
2.75228	14.0762
2.75562	13.5784
2.75895	13.0818
2.76228	12.5867
2.76562	12.0938
2.76895	11.6048
2.77228	11.1225
2.77562	10.6509
2.77895	10.1945
2.78228	9.75823
2.78562	9.34649
2.78895	8.96281
2.79228	8.60935
2.79562	8.28695
2.79895	7.99483
2.80228	7.73108
2.80562	7.49302
2.80895	7.27737
2.81228	7.08079
2.81562	6.89983
2.81895	6.73145
2.82228	6.57284
2.82562	6.42151
2.82895	6.27542
2.83228	6.1329
2.83562	5.99253
2.83895	5.85324
2.84228	5.71436
2.84562	5.57524
2.84895	5.43582
2.85228	5.29599
2.85562	5.15616
2.85895	5.01657
2.86228	4.87792
2.86562	4.74083
2.86895	4.60601
2.87228	4.47422
2.87562	4.34601
2.87895	4.22186
2.88228	4.10193
2.88562	3.98612
2.88895	3.87412
2.89228	3.76517
2.89562	3.65835
2.89895	3.55273
2.90228	3.44729
2.90562	3.34138
2.90895	3.23439
2.91228	3.12644
2.91562	3.0179
2.91895	2.90966
2.92228	2.80321
2.92562	2.69997
2.92895	2.60174
2.93228	2.51013
2.93562	2.42668
2.93895	2.35254
2.94228	2.2887
2.94562	2.23559
2.94895	2.19333
2.95228	2.16174
2.95562	2.1401
2.95895	2.12759
2.96228	2.123
2.96562	2.12502
2.96895	2.13212
2.97228	2.14273
2.97562	2.15524
2.97895	2.16806
2.98228	2.17986
2.98562	2.18946
2.98895	2.19601
2.99228	2.19887
2.99562	2.19786
2.99895	2.19297
3.00228	2.18451
3.00562	2.17289
3.00895	2.15864
3.01228	2.14249
3.01562	2.12502
3.01895	2.10679
3.02228	2.08831
3.02562	2.06995
3.02895	2.05201
3.03228	2.03472
3.03562	2.01827
3.03895	2.00272
3.04228	1.98817
3.04562	1.97464
3.04895	1.96218
3.05228	1.95086
3.05562	1.94055
3.05895	1.93131
3.06228	1.92308
3.06562	1.91575
3.06895	1.90926
3.07228	1.90347
3.07562	1.89829
3.07895	1.89358
3.08228	1.88917
3.08562	1.885
3.08895	1.88094
3.09228	1.87689
3.09562	1.87278
3.09895	1.86855
3.10228	1.86414
3.10562	1.85949
3.10895	1.85466
3.11228	1.84959
3.11562	1.84435
3.11895	1.83892
3.12228	1.8335
3.12562	1.82813
3.12895	1.82283
3.13228	1.81782
3.13562	1.81317
3.13895	1.80894
3.14228	1.80537
3.14562	1.80238
3.14895	1.80024
3.15228	1.79899
3.15562	1.79857
3.15895	1.79917
3.16228	1.80084
3.16562	1.80346
3.16895	1.80721
3.17228	1.81192
3.17562	1.81764
3.17895	1.82432
3.18228	1.83189
3.18562	1.84035
3.18895	1.84953
3.19228	1.85955
3.19562	1.87021
3.19895	1.88166
3.20228	1.89382
3.20562	1.90663
3.20895	1.92016
3.21228	1.93435
3.21562	1.94913
3.21895	1.96445
3.22228	1.98025
3.22562	1.9964
3.22895	2.01279
3.23228	2.02918
3.23562	2.04551
3.23895	2.06155
3.24228	2.0771
3.24562	2.092
3.24895	2.10607
3.25228	2.11912
3.25562	2.13093
3.25895	2.14142
3.26228	2.15036
3.26562	2.15775
3.26895	2.16335
3.27228	2.16722
3.27562	2.16931
3.27895	2.16949
3.28228	2.16776
3.28562	2.16424
3.28895	2.15882
3.29228	2.15155
3.29562	2.14261
3.29895	2.13188
3.30228	2.11954
3.30562	2.10559
3.30895	2.09022
3.31228	2.07359
3.31562	2.05576
3.31895	2.03699
3.32228	2.01744
3.32562	1.99741
3.32895	1.97709
3.33228	1.95676
3.33562	1.93673
3.33895	1.91712
3.34228	1.89811
3.34562	1.87993
3.34895	1.86265
3.35228	1.84637
3.35562	1.83105
3.35895	1.81687
3.36228	1.8037
3.36562	1.79166
3.36895	1.78063
3.37228	1.77073
3.37562	1.76185
3.37895	1.75399
3.38228	1.74719
3.38562	1.74135
3.38895	1.73646
3.39228	1.73253
3.39562	1.72943
3.39895	1.72716
3.40228	1.72573
3.40562	1.72502
3.40895	1.72496
3.41228	1.72555
3.41562	1.72675
3.41895	1.72842
3.42228	1.73056
3.42562	1.73306
3.42895	1.73604
3.43228	1.73932
3.43562	1.74296
3.43895	1.74689
3.44228	1.75107
3.44562	1.75542
3.44895	1.75995
3.45228	1.7646
3.45562	1.76924
3.45895	1.77383
3.46228	1.77836
3.46562	1.7826
3.46895	1.78671
3.47228	1.79046
3.47562	1.79398
3.47895	1.79714
3.48228	1.79994
3.48562	1.80238
3.48895	1.80435
3.49228	1.8059
3.49562	1.80691
3.49895	1.80751
3.50228	1.80763
3.50562	1.80733
3.50895	1.80656
3.51228	1.80542
3.51562	1.80399
3.51895	1.80227
3.52228	1.8003
3.52562	1.79809
3.52895	1.79565
3.53228	1.79309
3.53562	1.79034
3.53895	1.78748
3.54228	1.78462
3.54562	1.7817
3.54895	1.7789
3.55228	1.77634
3.55562	1.77401
3.55895	1.77211
3.56228	1.77062
3.56562	1.76972
3.56895	1.76936
3.57228	1.76966
3.57562	1.77062
3.57895	1.77222
3.58228	1.77455
3.58562	1.77765
3.58895	1.78152
3.59228	1.78623
3.59562	1.79178
3.59895	1.79821
3.60228	1.8056
3.60562	1.81395
3.60895	1.82331
3.61228	1.83356
3.61562	1.84476
3.61895	1.85692
3.62228	1.86998
3.62562	1.88386
3.62895	1.89859
3.63228	1.9142
3.63562	1.93059
3.63895	1.94788
3.64228	1.96606
3.64562	1.98507
3.64895	2.0051
3.65228	2.02602
3.65562	2.04808
3.65895	2.07126
3.66228	2.09564
3.66562	2.12133
3.66895	2.14839
3.67228	2.177
3.67562	2.20728
3.67895	2.23941
3.68228	2.27356
3.68562	2.30986
3.68895	2.34848
3.69228	2.38961
3.69562	2.43348
3.69895	2.48015
3.70228	2.52986
3.70562	2.58267
3.70895	2.63882
3.71228	2.69836
3.71562	2.76148
3.71895	2.82836
3.72228	2.89905
3.72562	2.97374
3.72895	3.05253
3.73228	3.13562
3.73562	3.223
3.73895	3.31479
3.74228	3.411
3.74562	3.51155
3.74895	3.61651
3.75228	3.72571
3.75562	3.83908
3.75895	3.9565
3.76228	4.07779
3.76562	4.20266
3.76895	4.33099
3.77228	4.46248
3.77562	4.59677
3.77895	4.7335
3.78228	4.87232
3.78562	5.01269
3.78895	5.15413
3.79228	5.29605
3.79562	5.43785
3.79895	5.57894
3.80228	5.71853
3.80562	5.85598
3.80895	5.99045
3.81228	6.12116
3.81562	6.2474
3.81895	6.3684
3.82228	6.48338
3.82562	6.59168
3.82895	6.69253
3.83228	6.78533
3.83562	6.86938
3.83895	6.94424
3.84228	7.00921
3.84562	7.06393
3.84895	7.10791
3.85228	7.14076
3.85562	7.16215
3.85895	7.17187
3.86228	7.1696
3.86562	7.15524
3.86895	7.12866
3.87228	7.08991
3.87562	7.03901
3.87895	6.97595
3.88228	6.90097
3.88562	6.81424
3.88895	6.71607
3.89228	6.60688
3.89562	6.48713
3.89895	6.35743
3.90228	6.21837
3.90562	6.07067
3.90895	5.91522
3.91228	5.7528
3.91562	5.58448
3.91895	5.41115
3.92228	5.23394
3.92562	5.05382
3.92895	4.87196
3.93228	4.68934
3.93562	4.50706
3.93895	4.32605
3.94228	4.14723
3.94562	3.97152
3.94895	3.79968
3.95228	3.63243
3.95562	3.47048
3.95895	3.31438
3.96228	3.16465
3.96562	3.02166
3.96895	2.8857
3.97228	2.75707
3.97562	2.63584
3.97895	2.52217
3.98228	2.41596
3.98562	2.31719
3.98895	2.22576
3.99228	2.14148
3.99562	2.06417
3.99895	1.99348
4.00228	1.92922
4.00562	1.87105
4.00895	1.81854
4.01228	1.77133
4.01562	1.72913
4.01895	1.69146
4.02228	1.65808
4.02562	1.62858
4.02895	1.60265
4.03228	1.58006
4.03562	1.56045
4.03895	1.54364
4.04228	1.52934
4.04562	1.51742
4.04895	1.50758
4.05228	1.49971
4.05562	1.49351
4.05895	1.48892
4.06228	1.48576
4.06562	1.48386
4.06895	1.48308
4.07228	1.48332
4.07562	1.48445
4.07895	1.48636
4.08228	1.48892
4.08562	1.49214
4.08895	1.49584
4.09228	1.49995
4.09562	1.50448
4.09895	1.50931
4.10228	1.51438
4.10562	1.51974
4.10895	1.52522
4.11228	1.53083
4.11562	1.53661
4.11895	1.54245
4.12228	1.54829
4.12562	1.55419
4.12895	1.56003
4.13228	1.56575
4.13562	1.57124
4.13895	1.57648
4.14228	1.58131
4.14562	1.58578
4.14895	1.58972
4.15228	1.59323
4.15562	1.59615
4.15895	1.59854
4.16228	1.60038
4.16562	1.6017
4.16895	1.60247
4.17228	1.60271
4.17562	1.60229
4.17895	1.60134
4.18228	1.59973
4.18562	1.59752
4.18895	1.59472
4.19228	1.59121
4.19562	1.58703
4.19895	1.58226
4.20228	1.57678
4.20562	1.57064
4.20895	1.56397
4.21228	1.55663
4.21562	1.54877
4.21895	1.54036
4.22228	1.53154
4.22562	1.5223
4.22895	1.51277
4.23228	1.50293
4.23562	1.49286
4.23895	1.48261
4.24228	1.47212
4.24562	1.46139
4.24895	1.45048
4.25228	1.43933
4.25562	1.42801
4.25895	1.41644
4.26228	1.4047
4.26562	1.3929
4.26895	1.3811
4.27228	1.36942
4.27562	1.35803
4.27895	1.34701
4.28228	1.33651
4.28562	1.32662
4.28895	1.3175
4.29228	1.30928
4.29562	1.30188
4.29895	1.29551
4.30228	1.29014
4.30562	1.28585
4.30895	1.28269
4.31228	1.28067
4.31562	1.27995
4.31895	1.28049
4.32228	1.28239
4.32562	1.28579
4.32895	1.29074
4.33228	1.2973
4.33562	1.3054
4.33895	1.31506
4.34228	1.3262
4.34562	1.33878
4.34895	1.35267
4.35228	1.36775
4.35562	1.38384
4.35895	1.40095
4.36228	1.41883
4.36562	1.43743
4.36895	1.45656
4.37228	1.47623
4.37562	1.49614
4.37895	1.51616
4.38228	1.53625
4.38562	1.55604
4.38895	1.57541
4.39228	1.59419
4.39562	1.61219
4.39895	1.62923
4.40228	1.64521
4.40562	1.65993
4.40895	1.67334
4.41228	1.68526
4.41562	1.69557
4.41895	1.70428
4.42228	1.71119
4.42562	1.71626
4.42895	1.71942
4.43228	1.72061
4.43562	1.71977
4.43895	1.71697
4.44228	1.71214
4.44562	1.70535
4.44895	1.69659
4.45228	1.68592
4.45562	1.67352
4.45895	1.65939
4.46228	1.64378
4.46562	1.62667
4.46895	1.60831
4.47228	1.5887
4.47562	1.56808
4.47895	1.5465
4.48228	1.52421
4.48562	1.50132
4.48895	1.47796
4.49228	1.45435
4.49562	1.43069
4.49895	1.40715
4.50228	1.3839
4.50562	1.36101
4.50895	1.33872
4.51228	1.31702
4.51562	1.2961
4.51895	1.27602
4.52228	1.25676
4.52562	1.23841
4.52895	1.22106
4.53228	1.20467
4.53562	1.18941
4.53895	1.17517
4.54228	1.16211
4.54562	1.15019
4.54895	1.13946
4.55228	1.12981
4.55562	1.12128
4.55895	1.11377
4.56228	1.10734
4.56562	1.10185
4.56895	1.0972
4.57228	1.09333
4.57562	1.09023
4.57895	1.08778
4.58228	1.086
4.58562	1.08469
4.58895	1.08397
4.59228	1.08367
4.59562	1.08391
4.59895	1.08457
4.60228	1.08564
4.60562	1.08713
4.60895	1.08898
4.61228	1.09106
4.61562	1.09345
4.61895	1.09601
4.62228	1.09863
4.62562	1.10132
4.62895	1.104
4.63228	1.10662
4.63562	1.10912
4.63895	1.11157
4.64228	1.11383
4.64562	1.1161
4.64895	1.11824
4.65228	1.12027
4.65562	1.1223
4.65895	1.1242
4.66228	1.12611
4.66562	1.12796
4.66895	1.12981
4.67228	1.13165
4.67562	1.13344
4.67895	1.13529
4.68228	1.1372
4.68562	1.13922
4.68895	1.14143
4.69228	1.14381
4.69562	1.14638
4.69895	1.14924
4.70228	1.1524
4.70562	1.15591
4.70895	1.15991
4.71228	1.16432
4.71562	1.16915
4.71895	1.17457
4.72228	1.18053
4.72562	1.18715
4.72895	1.19442
4.73228	1.2024
4.73562	1.21117
4.73895	1.2207
4.74228	1.23107
4.74562	1.2424
4.74895	1.25468
4.75228	1.26791
4.75562	1.28216
4.75895	1.29735
4.76228	1.31351
4.76562	1.33061
4.76895	1.34861
4.77228	1.36751
4.77562	1.38724
4.77895	1.40762
4.78228	1.42866
4.78562	1.4503
4.78895	1.47235
4.79228	1.49482
4.79562	1.51759
4.79895	1.54066
4.80228	1.56385
4.80562	1.58709
4.80895	1.61046
4.81228	1.63376
4.81562	1.65695
4.81895	1.67996
4.82228	1.70273
4.82562	1.72508
4.82895	1.74695
4.83228	1.76835
4.83562	1.78909
4.83895	1.80924
4.84228	1.82867
4.84562	1.84739
4.84895	1.86539
4.85228	1.88267
4.85562	1.89924
4.85895	1.91504
4.86228	1.93006
4.86562	1.94424
4.86895	1.95765
4.87228	1.97023
4.87562	1.98191
4.87895	1.99282
4.88228	2.00289
4.88562	2.01213
4.88895	2.02066
4.89228	2.02852
4.89562	2.03568
4.89895	2.04229
4.90228	2.04837
4.90562	2.05386
4.90895	2.0588
4.91228	2.06316
4.91562	2.06703
4.91895	2.07025
4.92228	2.07287
4.92562	2.0749
4.92895	2.07627
4.93228	2.07692
4.93562	2.07686
4.93895	2.07603
4.94228	2.07448
4.94562	2.07222
4.94895	2.06912
4.95228	2.06524
4.95562	2.06059
4.95895	2.05511
4.96228	2.04879
4.96562	2.04164
4.96895	2.03359
4.97228	2.02459
4.97562	2.01464
4.97895	2.00373
4.98228	1.99169
4.98562	1.97858
4.98895	1.96433
4.99228	1.94889
4.99562	1.93232
4.99895	1.91462
5.00228	1.89579
5.00562	1.87582
5.00895	1.8549
5.01228	1.83296
5.01562	1.81019
5.01895	1.78653
5.02228	1.76209
5.02562	1.73694
5.02895	1.71101
5.03228	1.68449
5.03562	1.65725
5.03895	1.62947
5.04228	1.6011
5.04562	1.57219
5.04895	1.54281
5.05228	1.513
5.05562	1.4829
5.05895	1.45257
5.06228	1.42199
5.06562	1.39135
5.06895	1.36071
5.07228	1.33008
5.07562	1.29968
5.07895	1.26952
5.08228	1.23978
5.08562	1.21045
5.08895	1.18172
5.09228	1.15365
5.09562	1.12641
5.09895	1.10006
5.10228	1.07473
5.10562	1.05047
5.10895	1.02741
5.11228	1.00547
5.11562	0.984848
5.11895	0.965536
5.12228	0.947595
5.12562	0.930965
5.12895	0.915706
5.13228	0.901818
5.13562	0.889301
5.13895	0.878155
5.14228	0.86832
5.14562	0.859857
5.14895	0.852644
5.15228	0.846744
5.15562	0.841975
5.15895	0.838339
5.16228	0.835657
5.16562	0.833988
5.16895	0.833094
5.17228	0.832975
5.17562	0.833511
5.17895	0.834644
5.18228	0.836253
5.18562	0.838339
5.18895	0.840783
5.19228	0.843585
5.19562	0.846624
5.19895	0.849843
5.20228	0.85324
5.20562	0.856757
5.20895	0.860214
5.21228	0.863612
5.21562	0.86695
5.21895	0.870168
5.22228	0.873208
5.22562	0.876069
5.22895	0.878692
5.23228	0.881016
5.23562	0.883102
5.23895	0.88495
5.24228	0.886559
5.24562	0.88799
5.24895	0.889182
5.25228	0.890195
5.25562	0.89103
5.25895	0.891745
5.26228	0.892401
5.26562	0.892937
5.26895	0.893295
5.27228	0.893593
5.27562	0.893772
5.27895	0.893831
5.28228	0.893712
5.28562	0.893533
5.28895	0.893176
5.29228	0.892818
5.29562	0.892401
5.29895	0.891984
5.30228	0.891626
5.30562	0.891387
5.30895	0.891268
5.31228	0.891387
5.31562	0.891685
5.31895	0.892162
5.32228	0.892878
5.32562	0.893772
5.32895	0.894845
5.33228	0.896215
5.33562	0.897706
5.33895	0.899494
5.34228	0.901461
5.34562	0.903785
5.34895	0.906348
5.35228	0.909328
5.35562	0.912607
5.35895	0.916243
5.36228	0.920296
5.36562	0.924766
5.36895	0.929713
5.37228	0.935078
5.37562	0.940919
5.37895	0.947297
5.38228	0.95427
5.38562	0.961781
5.38895	0.970006
5.39228	0.978827
5.39562	0.988364
5.39895	0.998557
5.40228	1.0094
5.40562	1.02085
5.40895	1.03289
5.41228	1.04553
5.41562	1.05864
5.41895	1.07223
5.42228	1.08635
5.42562	1.10096
5.42895	1.11604
5.43228	1.13153
5.43562	1.14745
5.43895	1.16366
5.44228	1.18017
5.44562	1.19686
5.44895	1.21367
5.45228	1.23042
5.45562	1.24711
5.45895	1.26362
5.46228	1.27977
5.46562	1.29563
5.46895	1.31094
5.47228	1.32573
5.47562	1.33985
5.47895	1.35326
5.48228	1.36584
5.48562	1.37752
5.48895	1.38819
5.49228	1.39785
5.49562	1.40637
5.49895	1.4137
5.50228	1.41984
5.50562	1.42479
5.50895	1.42843
5.51228	1.43075
5.51562	1.43182
5.51895	1.43164
5.52228	1.43015
5.52562	1.42741
5.52895	1.42336
5.53228	1.41805
5.53562	1.41156
5.53895	1.40381
5.54228	1.39493
5.54562	1.38491
5.54895	1.37383
5.55228	1.36179
5.55562	1.34885
5.55895	1.33508
5.56228	1.3206
5.56562	1.30546
5.56895	1.28984
5.57228	1.27375
5.57562	1.25724
5.57895	1.24049
5.58228	1.22344
5.58562	1.20634
5.58895	1.18905
5.59228	1.17177
5.59562	1.15448
5.59895	1.13732
5.60228	1.12021
5.60562	1.10328
5.60895	1.08653
5.61228	1.07008
5.61562	1.05399
5.61895	1.03819
5.62228	1.02288
5.62562	1.00809
5.62895	0.993788
5.63228	0.980079
5.63562	0.966966
5.63895	0.954449
5.64228	0.942588
5.64562	0.931263
5.64895	0.920594
5.65228	0.910401
5.65562	0.900745
5.65895	0.891566
5.66228	0.882864
5.66562	0.874639
5.66895	0.866771
5.67228	0.85938
5.67562	0.852406
5.67895	0.84579
5.68228	0.839591
5.68562	0.83375
5.68895	0.828266
5.69228	0.823081
5.69562	0.818193
5.69895	0.813603
5.70228	0.809312
5.70562	0.805259
5.70895	0.801504
5.71228	0.797927
5.71562	0.794649
5.71895	0.791669
5.72228	0.788987
5.72562	0.786543
5.72895	0.784457
5.73228	0.782609
5.73562	0.781059
5.73895	0.779808
5.74228	0.778794
5.74562	0.77796
5.74895	0.777364
5.75228	0.776887
5.75562	0.776649
5.75895	0.77647
5.76228	0.776529
5.76562	0.776768
5.76895	0.777245
5.77228	0.778139
5.77562	0.77939
5.77895	0.781119
5.78228	0.783384
5.78562	0.786245
5.78895	0.789642
5.79228	0.793755
5.79562	0.798523
5.79895	0.804007
5.80228	0.810206
5.80562	0.81718
5.80895	0.824928
5.81228	0.833571
5.81562	0.843167
5.81895	0.853717
5.82228	0.86534
5.82562	0.878036
5.82895	0.891864
5.83228	0.906825
5.83562	0.922978
5.83895	0.940263
5.84228	0.9588
5.84562	0.97847
5.84895	0.999272
5.85228	1.02121
5.85562	1.04421
5.85895	1.06817
5.86228	1.09303
5.86562	1.11872
5.86895	1.14512
5.87228	1.17213
5.87562	1.1996
5.87895	1.22744
5.88228	1.25557
5.88562	1.28388
5.88895	1.31226
5.89228	1.34057
5.89562	1.3687
5.89895	1.39648
5.90228	1.42384
5.90562	1.45054
5.90895	1.47635
5.91228	1.50126
5.91562	1.52498
5.91895	1.5474
5.92228	1.5685
5.92562	1.58811
5.92895	1.60617
5.93228	1.62262
5.93562	1.6374
5.93895	1.65045
5.94228	1.66172
5.94562	1.67131
5.94895	1.67906
5.95228	1.68502
5.95562	1.6892
5.95895	1.69164
5.96228	1.6923
5.96562	1.69122
5.96895	1.68848
5.97228	1.68413
5.97562	1.67817
5.97895	1.67078
5.98228	1.66196
5.98562	1.65182
5.98895	1.64056
5.99228	1.62816
5.99562	1.61481
5.99895	1.60068
6.00228	1.58584
6.00562	1.57046
6.00895	1.55467
6.01228	1.53857
6.01562	1.5223
6.01895	1.50615
6.02228	1.49012
6.02562	1.47444
6.02895	1.4593
6.03228	1.44488
6.03562	1.43135
6.03895	1.41883
6.04228	1.40762
6.04562	1.39773
6.04895	1.38938
6.05228	1.38259
6.05562	1.37752
6.05895	1.37424
6.06228	1.37275
6.06562	1.37317
6.06895	1.37556
6.07228	1.37997
6.07562	1.38646
6.07895	1.39505
6.08228	1.40589
6.08562	1.41901
6.08895	1.43439
6.09228	1.45209
6.09562	1.47212
6.09895	1.49435
6.10228	1.51867
6.10562	1.54507
6.10895	1.57326
6.11228	1.60313
6.11562	1.63442
6.11895	1.66678
6.12228	1.70004
6.12562	1.73396
6.12895	1.76811
6.13228	1.80227
6.13562	1.83618
6.13895	1.86956
6.14228	1.90204
6.14562	1.93346
6.14895	1.9635
6.15228	1.99193
6.15562	2.01851
6.15895	2.04307
6.16228	2.06536
6.16562	2.08533
6.16895	2.10273
6.17228	2.11757
6.17562	2.12961
6.17895	2.13879
6.18228	2.14511
6.18562	2.14851
6.18895	2.14887
6.19228	2.14624
6.19562	2.14064
6.19895	2.13218
6.20228	2.12091
6.20562	2.10702
6.20895	2.09063
6.21228	2.07204
6.21562	2.05135
6.21895	2.02894
6.22228	2.00498
6.22562	1.97965
6.22895	1.9533
6.23228	1.92612
6.23562	1.89829
6.23895	1.8701
6.24228	1.84178
6.24562	1.81359
6.24895	1.78581
6.25228	1.75869
6.25562	1.73247
6.25895	1.70738
6.26228	1.68371
6.26562	1.6616
6.26895	1.64139
6.27228	1.62315
6.27562	1.60712
6.27895	1.59341
6.28228	1.58209
6.28562	1.5732
6.28895	1.56689
6.29228	1.56313
6.29562	1.56182
6.29895	1.56295
6.30228	1.56653
6.30562	1.57231
6.30895	1.58024
6.31228	1.59007
6.31562	1.60176
6.31895	1.61505
6.32228	1.62971
6.32562	1.64562
6.32895	1.66243
6.33228	1.67996
6.33562	1.69796
6.33895	1.71614
6.34228	1.7342
6.34562	1.7519
6.34895	1.76901
6.35228	1.78516
6.35562	1.80018
6.35895	1.81383
6.36228	1.82593
6.36562	1.83624
6.36895	1.84476
6.37228	1.8512
6.37562	1.85561
6.37895	1.85788
6.38228	1.85794
6.38562	1.85573
6.38895	1.85132
6.39228	1.84464
6.39562	1.83576
6.39895	1.82474
6.40228	1.81156
6.40562	1.79636
6.40895	1.77926
6.41228	1.76036
6.41562	1.7398
6.41895	1.71763
6.42228	1.69408
6.42562	1.66923
6.42895	1.64324
6.43228	1.6163
6.43562	1.58852
6.43895	1.56015
6.44228	1.53136
6.44562	1.50234
6.44895	1.47319
6.45228	1.44422
6.45562	1.41549
6.45895	1.38718
6.46228	1.35934
6.46562	1.33216
6.46895	1.30558
6.47228	1.27965
6.47562	1.2545
6.47895	1.23006
6.48228	1.2064
6.48562	1.18357
6.48895	1.16152
6.49228	1.1403
6.49562	1.11997
6.49895	1.1006
6.50228	1.08218
6.50562	1.06472
6.50895	1.04827
6.51228	1.03271
6.51562	1.01799
6.51895	1.00416
6.52228	0.991106
6.52562	0.978768
6.52895	0.967026
6.53228	0.95582
6.53562	0.945151
6.53895	0.934958
6.54228	0.925124
6.54562	0.915706
6.54895	0.906646
6.55228	0.897944
6.55562	0.889659
6.55895	0.881672
6.56228	0.874043
6.56562	0.866771
6.56895	0.859857
6.57228	0.85324
6.57562	0.846922
6.57895	0.840902
6.58228	0.835061
6.58562	0.829399
6.58895	0.823915
6.59228	0.818491
6.59562	0.813127
6.59895	0.807881
6.60228	0.802696
6.60562	0.797629
6.60895	0.792742
6.61228	0.787973
6.61562	0.783384
6.61895	0.778973
6.62228	0.774682
6.62562	0.77045
6.62895	0.766337
6.63228	0.762284
6.63562	0.758231
6.63895	0.754178
6.64228	0.750244
6.64562	0.74631
6.64895	0.742555
6.65228	0.738859
6.65562	0.735402
6.65895	0.732124
6.66228	0.729084
[truncated: 18,121 more rows]
