# Supplementary material for: Huang-Lian-Jie-Du Decoction Ameliorates Acute Ulcerative Colitis in Mice via Regulating NF-κB and Nrf2 Signaling Pathways and Enhancing Intestinal Barrier Function
Source: Front Pharmacol. 2019 Nov 21;10:1354. doi: 10.3389/fphar.2019.01354 (PMC6900672; doi:10.3389/fphar.2019.01354)
Supplement: Supplementary file 3 [file DataSheet_2.xlsx]

## Sheet: Colon length
Colon length (cm)
NO.	NC	Model	SASP	HLJDD-H	HLJDD-M	HLJDD-L
1	8.5	5.2	8	6.4	7.6	6.2
2	8.7	6.4	6.2	6.6	7.1	7
3	9.1	6.1	7.8	7.3	7.6	6.1
4	8.9	5.4	7.3	7.6	7.5	7.5
5	9.3	5.8	6.4	6	7.1	7
6	8.8	5.5	7.5	6	7.8	5.7
7	8.3	5	7.1	6.2	8.3	7.3
8	8.4	6	6.6	6.7	7.1	5.5
Mean	8.75	5.675	7.1125	6.6	7.5125	6.5375
SD	0.34641	0.480327	0.659951	0.587975	0.41897	0.757699

## Sheet: Macroscopic score
Macroscopic score
NO.	NC	Model	SASP	HLJDD-H	HLJDD-M	HLJDD-L
1	0	4	2	3	0	2
2	0	3	3	2	2	2
3	0	4	3	4	1	2
4	0	4	3	3	2	1
5	0	4	1	2	0	1
6	0	4	3	2	0	2
7	0	4	2	3	1	1
8	0	4	2	4	0	3
Mean	0	3.875	2.375	2.875	0.75	1.75
SD	0	0.353553	0.744024	0.834523	0.886405	0.707107

## Sheet: MPO activity
Plasma MPO activity (U/L)								Colon MPO activity (U/g)
NO.	NC	Model	SASP	HLJDD-H	HLJDD-M	HLJDD-L		NO.	NC	Model	SASP	HLJDD-H	HLJDD-M	HLJDD-L
1	71.7797	137.144	103.245	128.356	100.295	113.078		1	1.10489	3.86284	2.84114	3.91821	2.04534	3.11135
2	75.7129	141.111	104.228	111.111	88.8102	94.3953		2	1.56728	3.3609	2.95736	3.56443	2.3818	2.80686
3	102.262	172.075	144.543	114.061	76.6962	96.3619		3	1.62713	4.61323	2.97382	3.53393	2.76039	2.27492
4	67.8466	134.228	106.195	107.178	101.278	97.3451		4	2.2174	3.62213	2.89961	3.4983	1.99334	3.24056
5	83.5791	154.022	79.646	117.011	61.9469	109.144		5	2.01445	3.59327	3.31418	2.73439	2.42334	3.18521
Mean	80.236	147.716	107.571	115.543	85.8053	102.065		Mean	1.70623	3.81048	2.99722	3.44985	2.32084	2.92378
SD	13.6177	15.5757	23.3372	8.03331	16.6628	8.44137		SD	0.431124	0.482682	0.18472	0.434106	0.312482	0.399552
